# Supplementary material for: Monocarboxylate Transporter 4 Is a Therapeutic Target in Non-small Cell Lung Cancer with Aerobic Glycolysis Preference
Source: PubMed Central journal article supplement — Mol Ther Oncolytics. 2020 Jun 24;18:189–201. doi: 10.1016/j.omto.2020.06.012 (PMC7364124; doi:10.1016/j.omto.2020.06.012), 2020-06-24
Supplement: mmc2.pdf [file mmc2.pdf]

# Monocarboxylate Transporter 4 Is a Therapeutic Target in Non-small Cell Lung Cancer with Aerobic Glycolysis Preference

Ting-Chun Kuo,<sup>1</sup> Kuo-Yen Huang,<sup>2,3</sup> Shuenn-Chen Yang,<sup>2</sup> Sean Wu,<sup>2</sup> Wei-Chia Chung,<sup>1</sup> Yih-Leong Chang,<sup>4</sup> Tse-Ming Hong,<sup>5</sup> Shu-Ping Wang,<sup>2</sup> Hsuan-Yu Chen,<sup>6,7</sup> Tzu-Hung Hsiao,<sup>8</sup> and Pan-Chyr Yang<sup>1,2</sup>

<sup>1</sup>Department of Internal Medicine, College of Medicine, National Taiwan University, Taipei 10051, Taiwan; <sup>2</sup>Institute of Biomedical Sciences, Academia Sinica, Taipei 11529, Taiwan; <sup>3</sup>Graduate Institute of Health Industry Technology, College of Human Ecology, Chang Gung University of Science and Technology, Taoyuan 33303, Taiwan; <sup>4</sup>Department of Pathology and Graduate Institute of Pathology, College of Medicine, National Taiwan University, Taipei 10051, Taiwan; <sup>5</sup>Institute of Clinical Medicine, College of Medicine, National Cheng Kung University, Tainan 70101, Taiwan; <sup>6</sup>Institute of Statistical Science, Academia Sinica, Taipei 11529, Taiwan; <sup>7</sup>PhD Program in Microbial Genomics, National Chung Hsing University, Taichung 40227, Taiwan; <sup>8</sup>Department of Medical Research, Taichung Veterans General Hospital, Taichung 40705, Taiwan

**Targeting metabolic reprogramming is an emerging strategy in cancer therapy. However, clinical attempts to target metabolic reprogramming have been proved to be challenging, with metabolic heterogeneity of cancer being one of many reasons that causes treatment failure. Here, we stratified non-small cell lung cancer (NSCLC) cells, mainly lung adenocarcinoma, based on their metabolic phenotypes and demonstrated that the aerobic glycolysis-preference NSCLC cell subtype was resistant to the OXPHOS-targeting inhibitors. We identified that monocarboxylate transporter 4 (MCT4), a lactate transporter, was highly expressed in the aerobic glycolysis-preference subtype with function supporting the proliferation of these cells. Glucose could induce the expression of MCT4 in these cells through a  $\Delta$ Np63 $\alpha$  and Sp1-dependent pathway. Next, we showed that knockdown of MCT4 increased intracellular lactate concentration and induced a reactive oxygen species (ROS)-dependent cellular apoptosis in the aerobic glycolysis-preference NSCLC cell subtype. By scanning a panel of monoclonal antibodies with MCT4 neutralizing activity, we further identified a MCT4 immunoglobulin M (IgM) monoclonal antibody showing capable anti-proliferation efficacy on the aerobic glycolysis-preference NSCLC cell subtype. Our findings indicate that the metabolic heterogeneity is a critical factor for NSCLC therapy and manipulating the expression or function of MCT4 can be an effective strategy in targeting the aerobic glycolysis-preference NSCLC cell subtype.**

## INTRODUCTION

Molecularly targeted therapy has recently become mainstream in cancer treatment. However, cancer cells frequently become resistant to targeted therapy after a period of effective treatments.<sup>1,2</sup> To improve the therapeutic efficacy in cancer treatment, targeting fundamental cellular changes in cancer cells may provide promising solutions. Among the ten cancer hallmarks proposed by Weinberg and Hana-

han,<sup>3</sup> metabolic reprogramming is highlighted as an important aspect in cancer treatment.<sup>4,5</sup> Various small molecules that target different pathways involved in cancer metabolism have now been identified,<sup>6,7</sup> with some already undergoing clinical trials.<sup>8</sup> Unexpectedly, the efficacy of many metabolism-targeting drugs is inadequate. Some of these drugs even require combinations with other pharmacological agents to achieve their therapeutic efficacy.<sup>9</sup> One possible reason for this unsuccessful outcome is that the metabolic alterations in cancer cells are dynamically adaptive to their environmental influences.<sup>4,5</sup> Many studies indicate that cancer cells in the same population could further evolve into different metabolic subtypes with distinct sensitivities to metabolism-targeting drugs.<sup>10–12</sup>

Under normoxic conditions, the majority of ATP in cells are produced in the mitochondria through aerobic respiration. However, Otto Warburg first observed that highly proliferative cancer cells rely primarily on glycolysis for energy production even when oxygen is abundant, creating the term aerobic glycolysis.<sup>13</sup> Because aerobic glycolysis provides a faster rate of ATP production compared with that in oxidative phosphorylation (OXPHOS), cancer cells tend to use aerobic glycolysis to meet their fast-paced energy needs, with pyruvate breaking down into lactate for an extra NAD<sup>+</sup> instead of entering the citric acid cycle as acetyl coenzyme A (CoA).<sup>14</sup> But simultaneously, the intracellular lactate concentration can be 40-fold

Received 27 May 2020; accepted 19 June 2020;  
<https://doi.org/10.1016/j.omto.2020.06.012>.

**Correspondence:** Pan-Chyr Yang, Department of Internal Medicine, College of Medicine, National Taiwan University, Taipei 10051, Taiwan.

**E-mail:** [pcyang@ntu.edu.tw](mailto:pcyang@ntu.edu.tw)

**Correspondence:** Tzu-Hung Hsiao, Department of Medical Research, Taichung Veterans General Hospital, Taichung 40705, Taiwan.

**E-mail:** [d93921032@gmail.com](mailto:d93921032@gmail.com)

**Correspondence:** Hsuan-Yu Chen, Institute of Statistical Science, Academia Sinica, Taipei 11529, Taiwan.

**E-mail:** [hychen@stat.sinica.edu.tw](mailto:hychen@stat.sinica.edu.tw)

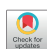

higher in the highly proliferative cancer cells compared to that in normal cells.<sup>15</sup> Thus, lactate has to be exported outside of cancer cells and into the tumor microenvironment. Because lactate is hydrophilic and a weak acid, it requires specific transporters to move across membranes. Monocarboxylate transporters (MCTs) are proton-linked membrane transporters that can carry lactate across the cellular membranes.<sup>16</sup> Among the fourteen members of the MCT family, MCT1 and MCT4 are studied intensively in lactate transport. MCT1 can transport lactate bi-directionally, while MCT4 primarily facilitates lactate efflux from cells.<sup>17,18</sup> MCT4 can manipulate the concentration of lactate in the tumor microenvironment and further regulate cancer cell proliferation, migration, and angiogenesis.<sup>19</sup> High expression of MCT4 has been observed in many types of cancers, while most cases are under hypoxic conditions.<sup>20,21</sup> As for the regulation of MCT4 expression, hypoxia-inducible factor-1 alpha (HIF-1 $\alpha$ ) is among the first transcription factor studied thoroughly. HIF-1 $\alpha$  controls the transcriptional activation of *SLC16A3* that encodes MCT4 via a hypoxia response element in the promoter region of *SLC16A3*.<sup>22</sup> In contrast to the regulation of MCT4 expression under hypoxia conditions, there is much less description for MCT4 regulation under normoxic conditions. For instance, the PI3K/AKT and KRAS/MEK signaling pathways were recently reported to be associated with MCT4 expression.<sup>23,24</sup>

Here we report that high MCT4 expression is strongly associated with the aerobic glycolysis-preference NSCLC cell subtype. We show that the expression of MCT4 can be induced by glucose through a  $\Delta$ Np63 $\alpha$  and Sp1-dependent pathway, which supports the proliferation of such subtype of NSCLC cells. Knockdown of MCT4 increases the intracellular lactate concentration and results in hindered aerobic glycolysis, thereby inducing a reactive oxygen species (ROS)-dependent cellular apoptosis. Furthermore, we develop an MCT4 immunoglobulin M (IgM) monoclonal antibody showing capable anti-proliferation efficacy on the aerobic glycolysis-preference NSCLC cell subtype. Our findings therefore reveal a novel therapeutic strategy for targeting MCT4 in the aerobic glycolysis-preference NSCLC cell subtype.

## RESULTS

### Aerobic Glycolysis-Preference NSCLC Cell Subtype Demonstrates Its Resistance to OXPHOS-Targeting Inhibitors

Acting as a single agent or part of a combination treatment in *in vivo* mouse models, the mitochondrial oxidative phosphorylation (OXPHOS)-targeting inhibitor metformin has been shown to efficiently suppress tumor growth in lung cancer.<sup>25</sup> To investigate whether metformin could exert a broad anti-cancer efficacy for NSCLC treatment, we inoculated nude mice with two NSCLC cell lines, A549 or Hop62, and treated the subcutaneous tumors with metformin at doses of either 250 mg/kg/day or 300 mg/kg/day. We found that the growth of A549 tumors was effectively suppressed by metformin treatment (Figure 1A), whereas the growth of Hop62 tumors was not inhibited, but instead were slightly promoted by metformin (Figure 1B). To investigate whether the heterogeneity in NSCLC causes the discrepancy in response to metformin treatment, we tested the drug suscep-

tibility of ten different NSCLC cell lines, mainly lung adenocarcinoma, to metformin and rotenone, another OXPHOS-targeting inhibitor. We found that not all of the NSCLC cell lines tested were sensitive to the treatment of OXPHOS-targeting inhibitors (Figures 1C and 1D). Notably, the NSCLC cell lines with resistance to one OXPHOS-targeting inhibitor tend to be resistant to another inhibitor as well. Since OXPHOS is a major metabolic pathway used for adenosine triphosphate (ATP) production, we used the Seahorse XF Analyzer to determine the rate of glycolytic and oxidative ATP production in these NSCLC cell lines next. The ratios of extracellular acidification rate (ECAR) to oxygen consumption rate (OCR) were measured and used to assign whether the given cell lines adopt to OXPHOS or aerobic glycolysis for the majority of their energy demands. As shown in Figure 1E, PC9, A549, and CL97 NSCLC cells with lower ECAR/OCR ratio ( $\leq 0.15$ ) preferred to use OXPHOS, while Hop62, CL141, and CL1-5 NSCLC cells with higher ECAR/OCR ratio ( $\geq 0.50$ ) relied on aerobic glycolysis for ATP production. Among the NSCLC cell lines, CL1-5 is a highly invasive subpopulation of cells derived from the parental CL1-0 lung cancer cells.<sup>26</sup> The ratio of ECAR/OCR in CL1-0 cells were much lower than that in CL1-5 cells. This observation is consistent with previous studies,<sup>27</sup> showing that aerobic glycolysis is the predominant bioenergetic pathway in cancer cells with higher migration and invasion abilities. Since the OXPHOS-targeting inhibitors had no significant growth inhibitory effects on NSCLC cells heavily relying on aerobic glycolysis for ATP production, we speculate that targeting the aerobic glycolysis pathway could be an ideal way to treat NSCLC cells showing resistance to the treatment of OXPHOS-targeting inhibitors.

### Glucose Upregulates MCT4 Expression in the Aerobic Glycolysis-Preference NSCLC Cell Subtype

Cancer cells using aerobic glycolysis as a preferred energy source usually produce lactate along with energy productions and result in a higher intracellular lactate concentration. To avoid damages caused by the gradual accumulation of lactate, cancer cells tend to overexpress lactate transporters, such as the MCT family members, for lactate efflux. Among the MCT transporters, MCT1, MCT2, MCT3, and MCT4 are well-known monocarboxylate transporters that control the concentration of lactate within the cell and in the tumor microenvironment. As expected, we found that the intracellular lactate concentration was much higher in the aerobic glycolysis-preference NSCLC cell subtype compared with the OXPHOS-preference NSCLC cell subtype (Figure 2A). Interestingly, only the expression of MCT4 in the testing NSCLC cell lines showed a strong correlation with the ratios of ECAR to OCR and the lactate concentrations (Figure 2B). Consistent with its protein levels, the mRNA level of *SLC16A3* gene, which encodes the MCT4 protein, was higher in the aerobic glycolysis-preference NSCLC cell subtype (Figure 2C). These data suggest that MCT4 plays a critical role in exporting lactate in the aerobic glycolysis-preference NSCLC cell subtype.

Since anaerobic glycolysis begins with the transformation of glucose to lactate, we sought to determine whether glucose could stimulate the expression of MCT4 in NSCLC cells. We chose two representative

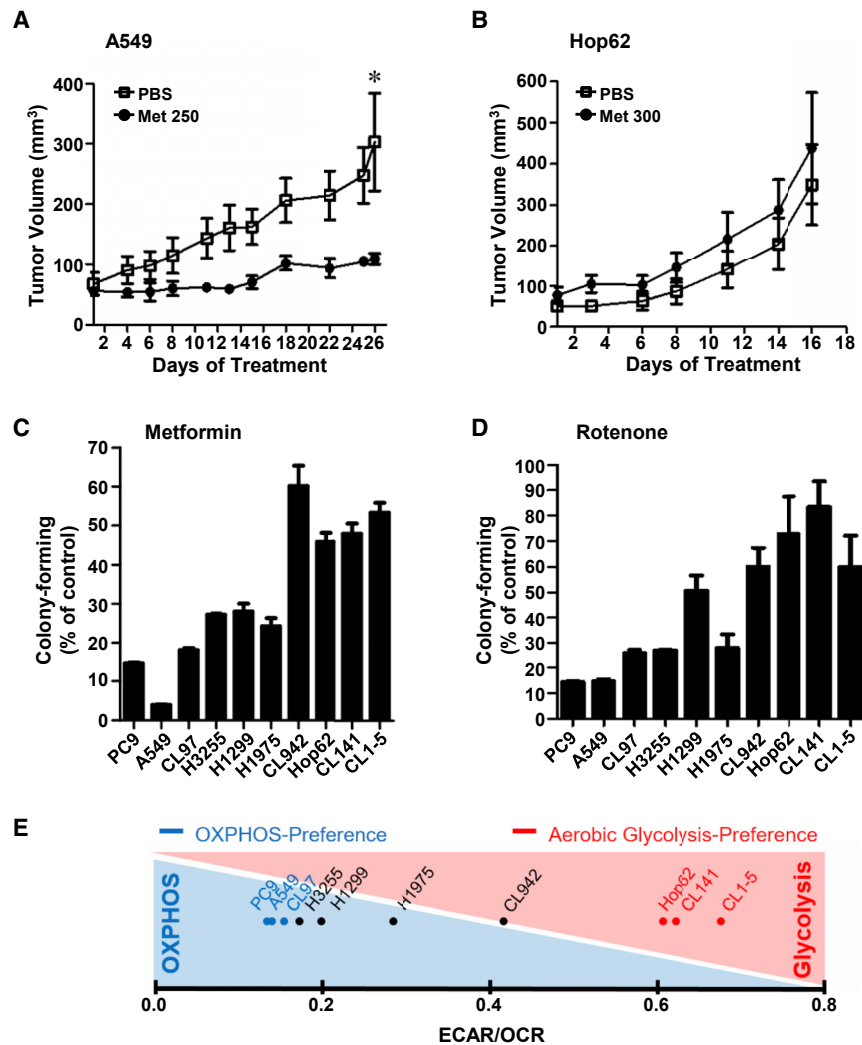

**Figure 1. Aerobic Glycolysis-Preference NSCLC Cell Subtype Demonstrates Its Resistance to OXPPOS-Targeting Inhibitors**

(A and B) The growth curve of A549 (A) and Hop62 (B) subcutaneous tumors in nude mice with or without metformin treatment (250 mg/kg metformin in A549 group; 300 mg/kg metformin in Hop62 group). The treatment duration was chosen as the tumor volume in the control group reached 300 mm<sup>3</sup>. Data represent mean and SD. n = 4. (C and D) The anti-proliferative effect of 10 mM metformin (C) and 100 nM rotenone (D) on the ten NSCLC cell lines. The colonies were fixed, stained, and dissolved as described in the [Materials and Methods](#). The graph indicated the total absorbance values at 490 nm in metformin or rotenone treatment groups relative to that in the solvent control group, which were set to 100%. Data represent mean and SD. n = 3. (E) The average basal ECAR and OCR levels of the ten NSCLC cells were measured using a Seahorse XF Analyzer. The two metabolic-preference subtypes were assigned according to the ratio of cellular ECAR to OCR. Cell lines with higher ratio (larger than 0.50) were classified as the aerobic glycolysis-preference subtype; cell lines with lower ratio (smaller than 0.15) were classified as the OXPPOS-preference subtype.

NSCLC cell lines in the aerobic glycolysis-preference NSCLC cell subtype (CL1-5 and Hop62) and two in the OXPPOS-preference NSCLC cell subtype (PC9 and CL97), respectively. We found that glucose induced MCT4 upregulation at both the mRNA and protein levels in CL1-5 and Hop62 cells, but not in PC9 and CL97 cells ([Figures 2D and 2E](#)). These data imply that glucose may stimulate the transcriptional activation of *SLC16A3* gene and result in higher levels of MCT4 expression in the aerobic glycolysis-preference NSCLC cell subtype. To identify the potential transcription factors (TFs) involved in this regulation, we used the chromatin immunoprecipitation on chip (ChIP-on-chip) data from TRANSFAC database, and Sp1 appeared as one of the candidates (data not shown). To verify this result, we checked the expression of Sp1 in all the testing NSCLC cell lines and the representative cell lines under differential glucose stimulations ([Figures 2D and 3C](#)). We found that glucose increased MCT4 expression in the aerobic glycolysis preference NSCLC cell subtype, but higher concentration of glucose (10 mM) reduced MCT4 expression in the OXPPOS-preference NSCLC cell subtype ([Figure 2D](#)).

Consistently, ectopic expression of Sp1 increased *SLC16A3* mRNA level in the aerobic glycolysis-preference NSCLC cell subtype cell lines, CL1-5 and Hop62, but had no or inhibitory effects in the OXPPOS-preference NSCLC cell subtype cell lines, PC9 and CL97 ([Figure 2F](#)). To further identify the specific binding sites of Sp1 on the promoter region of *SLC16A3* gene, we constructed a series of *SLC16A3* promoter sequences and used for the luciferase reporter assays in CL1-5 cells. As shown in [Figure 3A](#), we narrowed down the *SLC16A3* promoter region to within -253 to -14, which was further confirmed to be a critical region for the transcription of *SLC16A3* gene by Sp1. ChIP assays showed that Sp1 bound to the essential promoter region (-253 to -14) of the *SLC16A3* gene in the aerobic glycolysis-preference NSCLC cell subtype, but not in the OXPPOS-preference NSCLC cell subtype ([Figure 3B](#)). Taken together, these results indicate that Sp1 may be involved in the glucose-dependent MCT4 upregulation while the Sp1-mediated regulatory mechanisms on the *SLC16A3* gene may be different in these two metabolic subtypes of NSCLC cells.

#### The N-Terminally Truncated ( $\Delta$ N) Isoform of p63 $\alpha$ and Sp1 Coordinately Regulate the Expression of MCT4 in NSCLC Cells

We next attempted to identify the potential TFs that could promote the binding of Sp1 on the promoter region of *SLC16A3* gene in the aerobic glycolysis-preference NSCLC cell subtype. P63 $\alpha$  was identified as a candidate to interact with the promoter region of *SLC16A3* gene from the TRANSFAC database (data not shown). P63 is a

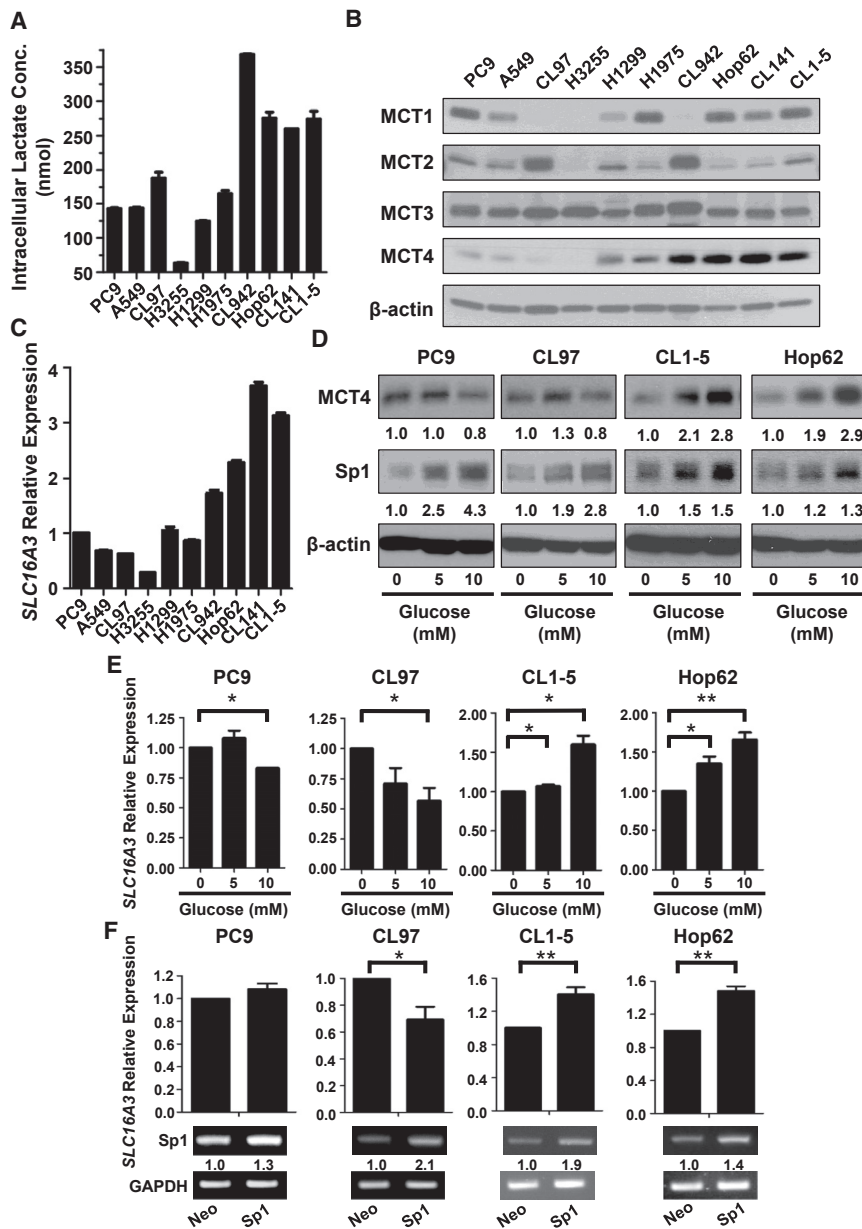

**Figure 2. Glucose Upregulates MCT4 Expression in the Aerobic Glycolysis-Preference NSCLC Cell Subtype**

(A) Intracellular lactate concentrations of the ten NSCLC cell lines were measured by a lactate assay kit.  $3 \times 10^5$  cells were collected for each cell line and the concentration was measured as described in the [Materials and Methods](#). Data represent mean and SD.  $n = 3$ . (B) The protein levels of MCT1 to 4 in the ten NSCLC cell lines were detected in whole-cell lysates by immunoblotting. (C) The mRNA level of MCT4 (*SLC16A3*) in the ten NSCLC cell lines was detected by qRT-PCR and the graph indicated the levels in each cell line relative to that in PC9. Data represent mean and SD.  $n = 3$ . (D) PC9, CL97, CL1-5, and Hop62 cells were treated with 0, 5, or 10 mM of glucose for 24 h. The protein levels of MCT4 and Sp1 were detected in whole-cell lysates by immunoblotting. (E) PC9, CL97, CL1-5, and Hop62 cells were treated with 0, 5, or 10 mM of glucose for 24 h. The mRNA level of MCT4 (*SLC16A3*) was detected by qRT-PCR. Data represent mean and SD.  $n = 3$ . (F) The mRNA level of MCT4 (*SLC16A3*) was detected by qRT-PCR in PC9, CL97, CL1-5, and Hop62 cells overexpressing Neo or Sp1. Data represent mean and SD.  $n = 3$ .

different transactivation activities,<sup>29</sup> we speculate that  $\Delta$ Np63 $\alpha$  and TAp63 $\alpha$  may exert distinct functions in regulating MCT4 expression in cells. Indeed, the ectopic expression of  $\Delta$ Np63 $\alpha$  promoted MCT4 levels whereas ectopically expressed TAp63 $\alpha$  decreased MCT4 expression in HEK293T cells ([Figure S1A](#)). Luciferase reporter experiments using the minimal *SLC16A3* promoter sequence demonstrated that  $\Delta$ Np63 $\alpha$  has the potential to activate the transcription of *SLC16A3* gene while TAp63 $\alpha$  may repress the promoter activity of *SLC16A3* ([Figure S1B](#)). To confirm that high levels of  $\Delta$ Np63 $\alpha$  contributes to high expression of MCT4 in NSCLC cells, we overexpressed  $\Delta$ Np63 $\alpha$  in the OXPHOS-preference NSCLC cell subtype cell lines (e.g., PC9, CL97, and A549) whose  $\Delta$ Np63 $\alpha$  levels were relatively low in comparison to that in the aerobic glycolysis-preference NSCLC cell subtype. The results showed that  $\Delta$ Np63 $\alpha$  overexpression promoted the upregulation of MCT4 in these NSCLC cell lines ([Figure 3D](#)). The ability of  $\Delta$ Np63 $\alpha$  to interact with Sp1 *in vivo* ([Figures 3E and S2A](#)) suggests that  $\Delta$ Np63 $\alpha$  may facilitate the binding of Sp1 to the promoter region of *SLC16A3* gene. We therefore examined whether  $\Delta$ Np63 $\alpha$  facilitates the recruitment of Sp1 to the minimal *SLC16A3* promoter region by ChIP experiments. Certainly, the overexpression of  $\Delta$ Np63 $\alpha$  significantly increased the binding of Sp1 to the promoter region of *SLC16A3* gene and subsequently stimulated the promoter activity of *SLC16A3* ([Figures 3F, 3G, S2B, and S2C](#)). Our results indicate that  $\Delta$ Np63 $\alpha$  acts

member of the p53 gene family that encodes for up to ten different isoforms through alternative promoter usage and alternative splicing. The TA isoforms contain the N-terminal transactivation domain (TA), whereas the  $\Delta$ N isoforms are transcribed from an alternative promoter and lack the entire TA domain.<sup>28</sup> We focused on two isoforms of p63 $\alpha$ , TAp63 $\alpha$  and  $\Delta$ Np63 $\alpha$ , whose expressions and functions are frequently associated with tumorigenesis. We found that the expression of  $\Delta$ Np63 $\alpha$ , but not TAp63 $\alpha$  or Sp1, was strongly associated with higher MCT4 expression, ECAR/OCR ratio, and intracellular lactate concentration in the aerobic glycolysis-preference NSCLC cell subtype ([Figures 1E, 2A, 2B, and 3C](#)). Since  $\Delta$ Np63 $\alpha$  and TAp63 $\alpha$  have been shown to exhibit

different transactivation activities,<sup>29</sup> we speculate that  $\Delta$ Np63 $\alpha$  and TAp63 $\alpha$  may exert distinct functions in regulating MCT4 expression in cells. Indeed, the ectopic expression of  $\Delta$ Np63 $\alpha$  promoted MCT4 levels whereas ectopically expressed TAp63 $\alpha$  decreased MCT4 expression in HEK293T cells ([Figure S1A](#)). Luciferase reporter experiments using the minimal *SLC16A3* promoter sequence demonstrated that  $\Delta$ Np63 $\alpha$  has the potential to activate the transcription of *SLC16A3* gene while TAp63 $\alpha$  may repress the promoter activity of *SLC16A3* ([Figure S1B](#)). To confirm that high levels of  $\Delta$ Np63 $\alpha$  contributes to high expression of MCT4 in NSCLC cells, we overexpressed  $\Delta$ Np63 $\alpha$  in the OXPHOS-preference NSCLC cell subtype cell lines (e.g., PC9, CL97, and A549) whose  $\Delta$ Np63 $\alpha$  levels were relatively low in comparison to that in the aerobic glycolysis-preference NSCLC cell subtype. The results showed that  $\Delta$ Np63 $\alpha$  overexpression promoted the upregulation of MCT4 in these NSCLC cell lines ([Figure 3D](#)). The ability of  $\Delta$ Np63 $\alpha$  to interact with Sp1 *in vivo* ([Figures 3E and S2A](#)) suggests that  $\Delta$ Np63 $\alpha$  may facilitate the binding of Sp1 to the promoter region of *SLC16A3* gene. We therefore examined whether  $\Delta$ Np63 $\alpha$  facilitates the recruitment of Sp1 to the minimal *SLC16A3* promoter region by ChIP experiments. Certainly, the overexpression of  $\Delta$ Np63 $\alpha$  significantly increased the binding of Sp1 to the promoter region of *SLC16A3* gene and subsequently stimulated the promoter activity of *SLC16A3* ([Figures 3F, 3G, S2B, and S2C](#)). Our results indicate that  $\Delta$ Np63 $\alpha$  acts



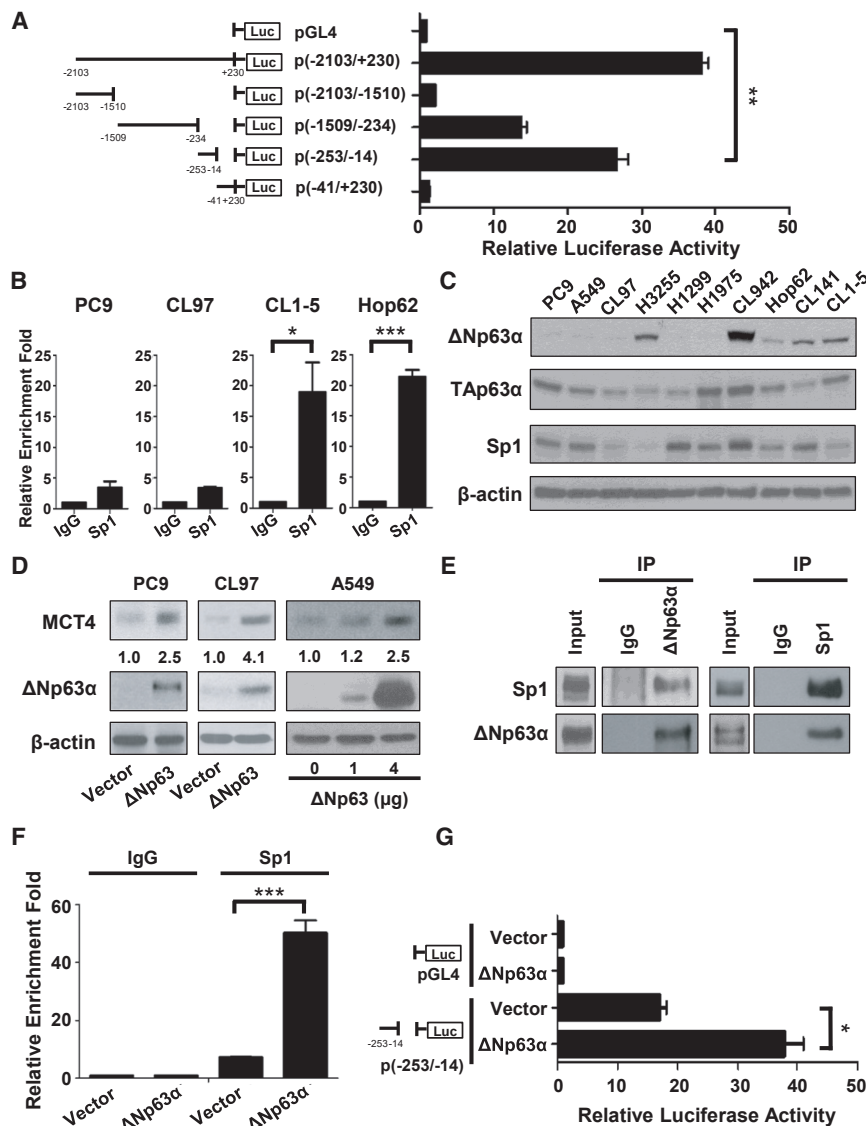

**Figure 3. N-Terminally Truncated ( $\Delta$ N) Isoform of p63 $\alpha$  and Sp1 Coordinately Regulate the Expression of MCT4 in NSCLC Cells**

(A) CL1-5 cells were co-transfected with indicated luciferase reporter constructs, together with pRL-SV40 as a transfection control. Luciferase activity was measured 48 h post-transfection. The promoter activity of different regions of *SLC16A3* promoter was expressed as a ratio of firefly/Renilla luciferase activities. Data represent mean and SD.  $n = 3$ . (B) The interaction of Sp1 with the specific region between  $-253$  and  $-14$  on the *SLC16A3* promoter was determined by ChIP assay in PC9, CL97, CL1-5, and Hop62. The ChIP assays were performed using anti-Sp1 antibody and the immunoprecipitated chromatin was analyzed using specific TaqMan probe with primers specific to the MCT4 (*SLC16A3*) promoter, between  $-253$  and  $-14$ . Data represent mean and SD.  $n = 3$ . (C) The protein levels of  $\Delta$ Np63 $\alpha$ , TAp63 $\alpha$ , and Sp1 in the ten NSCLC cell lines were detected in whole-cell lysates by immunoblotting. (D) The protein level of MCT4 was detected by immunoblotting in the three OXPHOS-preference NSCLC cell lines (PC9, CL97, and A549) with or without  $\Delta$ Np63 $\alpha$  overexpression. (E) The interaction between  $\Delta$ Np63 $\alpha$  and Sp1 was detected by the immunoprecipitation method in A549 cells overexpressing  $\Delta$ Np63 $\alpha$ . A549 cell lysates were immunoprecipitated with anti- $\Delta$ Np63 $\alpha$ , anti-rabbit IgG (left panel), anti-Sp1, or anti-rabbit IgG (right panel) antibodies, and immunoblotted with the indicated antibodies. (F) The interaction of Sp1 with the specific region between  $-253$  and  $-14$  on the *SLC16A3* promoter was determined by the ChIP assay in A549 cells with or without  $\Delta$ Np63 $\alpha$  overexpression. A549 cells were transfected with vector or  $\Delta$ Np63 $\alpha$  plasmids for 30 h, and ChIP assays were performed using anti-Sp1 antibody. Immunoprecipitated chromatin was analyzed using specific TaqMan probe with primers specific to the *SLC16A3* promoter, between  $-253$  and  $-14$ . Data represent mean and SD.  $n = 4$ . (G) A549 cells were co-transfected with vector or  $\Delta$ Np63 $\alpha$  plasmids, indicated luciferase reporter constructs, and pRL-SV40 as a transfection control. Luciferase activity was measured 48 h post-transfection. The promoter activity of the specific region between  $-253$  and  $-14$  on the *SLC16A3* promoter was expressed as a ratio of firefly/Renilla luciferase activities in A549 NSCLC cells with or without  $\Delta$ Np63 $\alpha$  overexpression. Data represent mean and SD.  $n = 3$ .

synergistically with Sp1 to activate *SLC16A3* gene transcription that results in high MCT4 expression in NSCLC cells.

#### High MCT4 Expression Supports Cell Growth of the Aerobic Glycolysis-Preference NSCLC Cell Subtype

High MCT4 expression in the aerobic glycolysis-preference NSCLC cell subtype contributes to the transport of excessive lactate produced by aerobic glycolysis. This prompts us to further elucidate whether MCT4 functions in supporting cell growth of this subtype of NSCLC cells *in vitro* and *in vivo*. We knocked down the expression of MCT4 by two individual lentiviral short hairpin RNAs (shRNAs) in the representative the aerobic glycolysis-preference subtype, CL1-5 and Hop62, and the OXPHOS-preference subtype, PC9 and CL97 (Fig-

ures 4A and S3A). As shown in Figures 4B and 4C, MCT4 knock-down significantly suppressed cell growth and the colony-forming ability in the aerobic glycolysis-preference NSCLC cell subtype, while showing very mild anti-proliferation effects in the OXPHOS-preference NSCLC cell subtype (Figures S3B and S3C). In an orthotopic lung tumor mouse model, we found that CL1-5 cells could not develop into a tumor nodule in the injected lung in the absence of MCT4 expression (Figure 4D). Similarly, a doxycycline-inducible lentiviral shRNA vector significantly decreased MCT4 expression in Hop62 cells, as well as the volume of Hop62 subcutaneous tumors (Figure 4E). These data indicate that high MCT4 expression greatly supports cancer cell growth and colonization. Interestingly, although MCT4 knockdown in the OXPHOS-preference subtype PC9 and

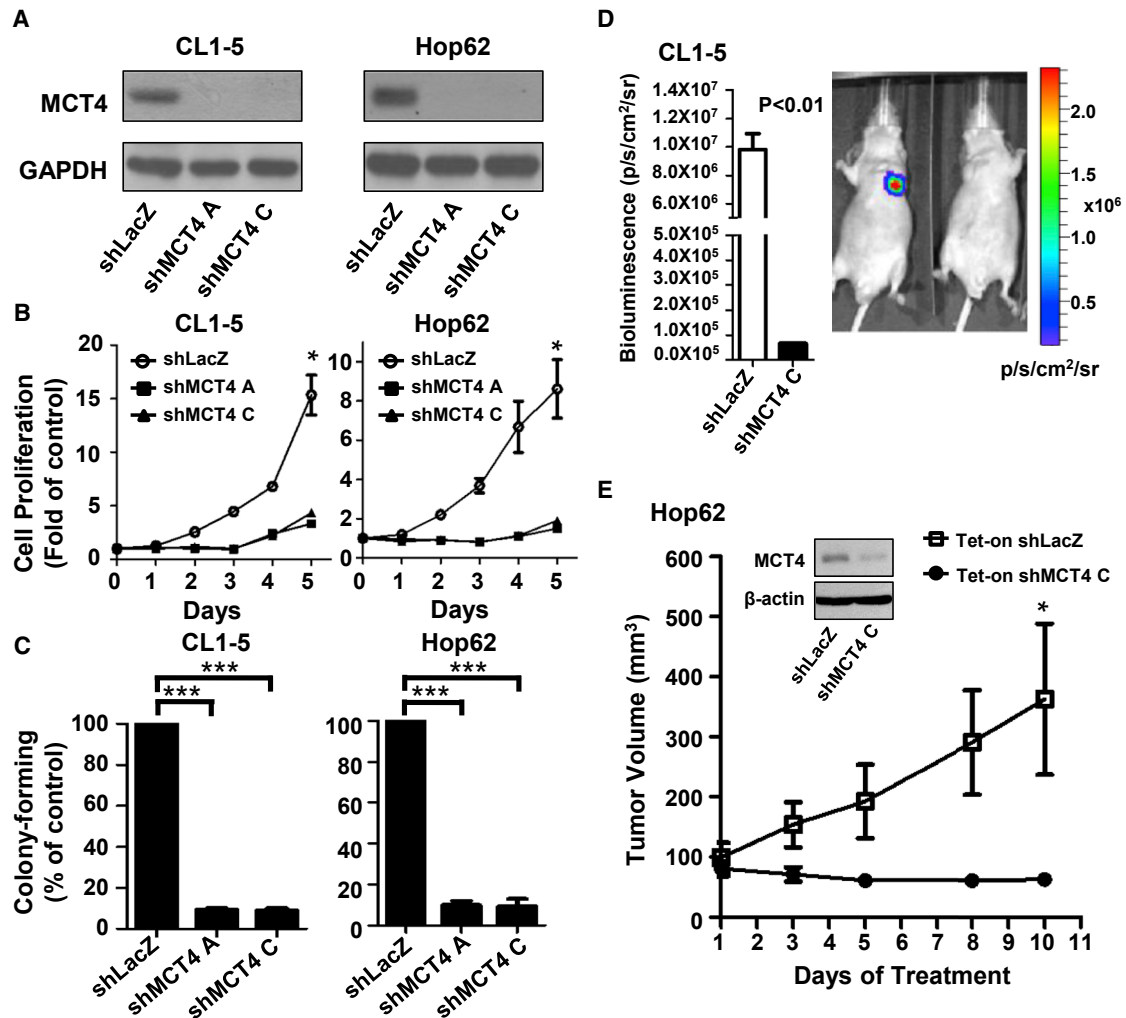

**Figure 4. HighMCT4 Expression Supports Cell Growth of the Aerobic Glycolysis-Preference NSCLC Cell Subtype**

(A) The protein level of MCT4 after transduction with shRNA virus targeting *SLC16A3* gene or LacZ control was detected by immunoblotting in CL1-5 and Hop62 cells. (B) The cell proliferation rate of CL1-5 and Hop62 cells after transduction with shRNA virus targeting *SLC16A3* gene or LacZ control was detected by SRB assays. The cells were fixed at the indicated day and detected as described in the [Materials and Methods](#). The graph indicated the fold change between each day versus day 0. Data represent mean and SD.  $n = 3$ . (C) The colony formation ability of CL1-5 and Hop62 cells was detected by colony-formation assays after transduction with shRNA virus targeting *SLC16A3* gene or LacZ control. The colonies were fixed, stained, and dissolved as described in the [Materials and Methods](#). The graph indicated the total absorbance values at 490 nm in shMCT4 groups relative to that in shLacZ groups, which were set to 100%. Data represent mean and SD.  $n = 3$ . (D) Representative in vivo imaging system (IVIS) images of male nude mice captured 14 days after orthotopic implantation of CL1-5-Luc cells with or without MCT4 knockdown by shRNA virus. The luminescence intensity of photons emitted from each tumor was quantified as shown in the figure. Data represent mean and SD.  $n = 3$ . (E) Hop62 cells were transduced with inducible-shRNA virus targeting *SLC16A3* gene or LacZ control and treated with doxycycline hyclate at 3  $\mu\text{g}/\text{mL}$  concentration for 5 days. The MCT4 expression in these cells was shown in the western blotting plot. Following the validation, these cells were implanted subcutaneously in nude mice. Mice were treated with doxycycline hyclate (25 mg/kg) daily by oral gavage and the growth curve of Hop62 subcutaneous tumors was measured for 10 days. Data represent mean and SD.  $n = 6$ .

CL97 cells had little effects on cancer cell growth and colonization (Figures S3A–S3C), we observed that MCT4 knockdown could significantly inhibit the growth of PC9 subcutaneous tumors in nude mice (Figure S3D). This unexpected result might be due to the fact that the *in vivo* growth condition is more complicated and harsher when compared to the *in vitro* culture condition, and therefore, cancer cells may require more energy to support their growth in the *in vivo* environment.

#### Depletion of MCT4 Hinders Aerobic Glycolysis and Causes ROS-Induced Cellular Apoptosis in the Aerobic Glycolysis-Preference NSCLC Cell Subtype

To identify the underlying mechanism that MCT4 regulates cancer cell growth, we knocked down the expression of MCT4 in the aerobic glycolysis-preference NSCLC cell subtype and measured the intracellular lactate concentration and pH levels. MCT4 knockdown significantly promoted the elevation of intracellular lactate concentration,

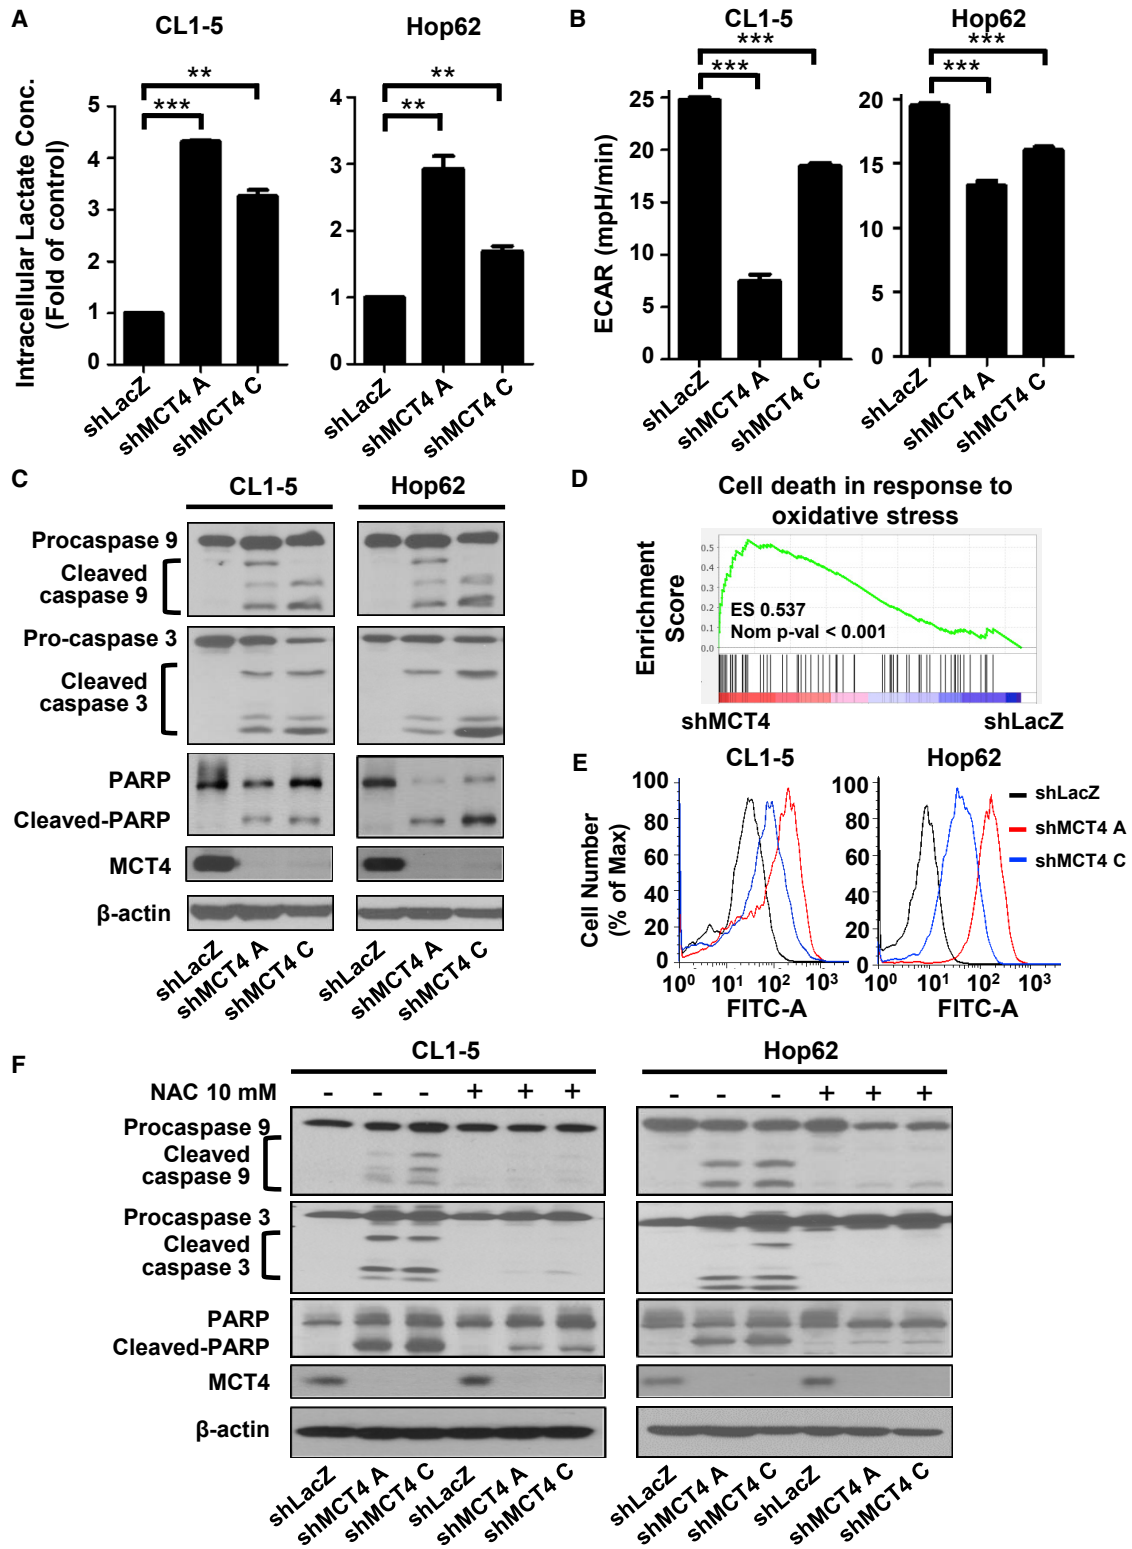

(legend on next page)

**Table 1. Intracellular pH of CL1-5 and Hop62 NSCLC Cells after Transduction with shRNA Virus Targeted *SLC16A3* Gene or LacZ Control**

| Cell Line | Intracellular pH |             |             |
|-----------|------------------|-------------|-------------|
|           | shLacZ           | shMCT4 A    | shMCT4 C    |
| CL1-5     | 7.49 ± 0.01      | 6.98 ± 0.11 | 6.83 ± 0.07 |
| Hop62     | 7.39 ± 0.09      | 6.99 ± 0.10 | 7.00 ± 0.05 |

and in turn, decreased intracellular pH level (Figure 5A; Table 1). The changes in intracellular environment would then block aerobic glycolysis and cause a significant decrease in the ECAR level (Figure 5B). The long-term inhibition of aerobic glycolysis would further trigger the proteolytic cleavage of critical intrinsic apoptosis markers, caspase-9, caspase-3, and Poly (ADP-ribose) polymerase (PARP), and induce cellular apoptosis in these cells (Figure 5C). Gene set enrichment analyses (GSEA) showed that MCT4 depletion upregulates the gene-expression programs involved in the intrinsic apoptosis pathway, with two of the top five upregulated gene sets relating to the oxidative stress-induced cell death (Table 2; Figure 5D). To verify this observation, we checked whether MCT4 depletion increases the concentration of ROS in the aerobic glycolysis-preference NSCLC cell subtype. As expected, an elevated level of intracellular ROS was detected when knocking down MCT4 in the aerobic glycolysis-preference NSCLC cell subtype (Figure 5E). Consistently, the MCT4 depletion-induced intrinsic apoptosis pathway was blocked in the aerobic glycolysis-preference NSCLC cell subtype when the intracellular ROS was effectively reduced by the antioxidant, N-acetylcysteine (NAC; Figures 5F and S4). Altogether, our results indicate that MCT4 plays a critical role in the transport of excessive lactate produced by aerobic glycolysis in NSCLC cells and loss of MCT4 may hinder aerobic glycolysis and cause a ROS-induced cellular apoptosis.

#### MCT4 Neutralizing Antibodies Can Effectively Target MCT4 and Inhibit Cell Growth of the Aerobic Glycolysis-Preference NSCLC Cell Subtype

Clinically, high MCT4 expression acts as a poor prognostic factor for the survival of NSCLC patients. This association could be observed in NSCLC patients from the Shedden cohort and the KM-plotter database (Figures S5A and S5B). The hazard ratios of high MCT4 expression in these databases were 1.72 and 1.21, respectively (Table S1). This similar trend could also be observed in our own NSCLC patient

dataset from the National Taiwan University Hospital (hazard ratio of high MCT4 expression, 1.81; Figures 6A and 6B; Table S1). Additionally, high MCT4 expression could be found in numerous cancers (e.g., kidney, colon, bladder, uterus, and cervix) implying the therapeutic potential of targeting MCT4 in other cancers (Figure S5C). To the best of our knowledge, only virally delivered shRNA techniques have been used to block the function of MCT4 in cancer cells. However, viral vectors are limitedly applied in the clinical setting due to safety concerns. Hence, we attempted to develop a neutralizing antibody to target MCT4 and inhibit the function of MCT4 for clinical applications.

We chose one of the MCT4 extracellular domains as an immunogenic peptide to produce various monoclonal antibodies and selected the candidates by screening their ability to promote the elevation of intracellular lactate concentration in the aerobic glycolysis-preference NSCLC cell subtype. One IgM monoclonal antibody showed promising efficacy in neutralizing MCT4 activity and received further testing. Flow cytometry analyses showed that this IgM monoclonal antibody could bind to MCT4 on the plasma membrane of CL1-5 cells and the interaction between the antibody and MCT4 could be competed out by the MCT4 immunogenic peptide (Figures 6C and 6D). The incubation of this IgM monoclonal antibody with CL1-5 cells significantly increased the intracellular lactate concentration and decreased the ratio of ECAR/OCR (Figures 6E and 6F). Moreover, this MCT4 IgM monoclonal antibody not only suppressed the colony-forming abilities of CL1-5 and Hop62 cells, but also inhibited the tumor growth of CL1-5 and Hop62 subcutaneous tumors in the *in vivo* xenograft mouse models (Figures 6G and 6H). We observed that this MCT4 IgM monoclonal antibody is relatively safe to the mice during treatments, resulting in minimal weight loss and no obvious toxicity to the kidney or liver tissue (Figure S6).

#### DISCUSSION

While under an energy-limited microenvironment, cancer cells can reprogram their metabolic pathways to meet their energy demands. The dynamic alterations in cancer cell metabolism cooperate with the tumor microenvironment, which occurs in different stages of tumor progression.<sup>30</sup> Because cancer cells may display distinct metabolic phenotypes in the same population, several metabolic profiling methods have been developed to sub-classify cancer cell types. For instance, Daemen et al.<sup>11</sup> divided pancreatic ductal adenocarcinomas

**Figure 5. Depletion of MCT4 Hinders Aerobic Glycolysis and Causes ROS-Induced Cellular Apoptosis in the Aerobic Glycolysis-Preference NSCLC Cell Subtype**

(A) Intracellular lactate concentration of CL1-5 and Hop62 cells after transduction with shRNA virus targeting *SLC16A3* gene or LacZ control was measured by a lactate assay kit. Data represent mean and SD. n = 3. (B) The basal ECAR level of CL1-5 and Hop62 cells after transduction with shRNA virus targeting *SLC16A3* gene or LacZ control was measured using a Seahorse XF analyzer. Data represent mean and SD. n = 5. (C) The protein levels of procaspase-9, cleaved caspase-9, procaspase-3, cleaved caspase-3, PARP, cleaved PARP, and MCT4 were detected in CL1-5 and Hop62 NSCLC cells at 72 h after transduction with shRNA virus targeting *SLC16A3* gene or LacZ control by immunoblotting. (D) GSEA revealed that *cell\_death\_in\_response\_to\_oxidative\_stress* was one of the top five gene sets positively associated with MCT4 knockdown in CL1-5 cells. (E) The intracellular ROS level in CL1-5 or Hop62 cells at 72 h after transduction with shRNA virus targeting *SLC16A3* gene or LacZ control was detected by flow cytometry with DCFH-DA dye. (F) The protein levels of procaspase-9, cleaved caspase-9, procaspase-3, cleaved caspase-3, PARP, cleaved PARP, and MCT4 were detected in CL1-5 and Hop62 NSCLC cells with or without 10 mM NAC treatment at 72 h after transduction with shRNA virus targeting *SLC16A3* gene or LacZ control by immunoblotting.



**Table 2. The Top Five Most Positively Enriched Gene Sets in MCT4 Knockdown Group**

| GO Terms                                          | Normalized Enrichment Score | Nominal p Value |
|---------------------------------------------------|-----------------------------|-----------------|
| Cellular response to glucose starvation           | 2.38                        | <0.001          |
| Perk mediated unfolded protein response           | 2.20                        | <0.001          |
| Cell death in response to oxidative stress        | 2.08                        | <0.001          |
| Regulation of oxidative stress induced cell death | 2.04                        | <0.001          |
| Spindle midzone                                   | 2.04                        | <0.001          |

into three subtypes—slow proliferating, glycolytic, and lipogenic—according to the levels of 256 different metabolites. Baek et al.<sup>24</sup> also classified pancreatic cancers into different metabolic subtypes based on different expression levels of metabolism-related genes. They further found that dysregulation of the KRAS/MEK signaling was associated with the upregulation of MCT4 expression in pancreatic cancer cells, and MEK inhibitors could effectively attenuate MCT4 expression in most of the testing pancreatic cancer cell lines. Nevertheless, the classification of lung cancer according to cancer cell metabolic phenotypes has so far been poorly described. Upon the treatment of OXPHOS-targeting inhibitors, we found that not all of the testing NSCLC cell lines, mainly lung adenocarcinoma, were sensitive to the treatment. The resistant cell lines were then further characterized as an aerobic glycolysis-preference phenotype that showed higher ECAR/OCR ratio. This subtype of NSCLC cells had higher intracellular lactate concentration and tend to express a higher level of MCT4 for lactate efflux. Thus, our data indicate that MCT4 is a key regulator for lactate efflux in cancer cells heavily relying on aerobic glycolysis.

High expression of MCT4 has been reported in numerous cancers,<sup>19,20</sup> while little is known about the regulation of MCT4 expression in response to cancer cell metabolism. In this study, we observed different expression levels of MCT4 in two different metabolic subtypes of NSCLC cells (Figure 2B), indicating the possibility of a distinct regulatory mechanism for MCT4 expression in different cellular contexts. Indeed, we found that glucose increased MCT4 expression in the aerobic glycolysis preference NSCLC cell subtype, but a higher concentration of glucose reduced MCT4 expression in the OXPHOS-preference NSCLC cell subtype (Figure 2D). We also found that glucose induced an upregulation of Sp1 in both subtypes of NSCLC cells, while this observation could not explain the distinct MCT4 regulations. Interestingly, we uncovered a novel mechanism by which two p63 $\alpha$  isoforms,  $\Delta$ Np63 $\alpha$  and TAp63 $\alpha$ , play critical roles in this discrepancy. We observed different expression patterns of  $\Delta$ Np63 $\alpha$  and TAp63 $\alpha$  in these two metabolic subtypes. TAp63 $\alpha$  was expressed equally in all the testing NSCLC cell lines, while  $\Delta$ Np63 $\alpha$  was expressed at a higher level in the aerobic glycolysis-preference NSCLC cell subtype (Figure 3C). We further demonstrated that  $\Delta$ Np63 $\alpha$  binds to Sp1 (Figure 3E) and enhances the binding of Sp1 on the promoter region of *SLC16A3* (Figure 3F), which results

in higher levels of MCT4 expression in the aerobic glycolysis-preference NSCLC cell subtype (Figure 3D). This suggests that  $\Delta$ Np63 $\alpha$  can upregulate the transactivation activity of Sp1 via a direct association between  $\Delta$ Np63 $\alpha$ , Sp1, and target promoters. By contrast, in NSCLC cells lacking  $\Delta$ Np63 $\alpha$  expression, TAp63 $\alpha$  alone could not promote MCT4 expression even when the expression of Sp1 was induced by glucose in the OXPHOS-preference NSCLC cell subtype (Figures 2D and 3C). This might suggest different regulatory mechanisms from these two p63 $\alpha$  isoforms in the regulation of MCT4 expression. Supporting this idea, we found that  $\Delta$ Np63 $\alpha$  and TAp63 $\alpha$  exert different transcriptional activities in the regulation of *SLC16A3* promoter and MCT4 expression in HEK293T cells (Figure S1). Consistent with our observations,  $\Delta$ Np63 $\alpha$  and TAp63 $\alpha$  have been shown to exhibit different transactivation specificities that depend on distinct DNA binding abilities.<sup>29</sup> Additionally, a TAp63 isoform has been reported to directly interact with Sp1, impairing its DNA binding activity.<sup>31</sup> Thus, the different regulatory mechanisms of  $\Delta$ Np63 $\alpha$  and TAp63 $\alpha$  in gene regulation may explain their distinct functions in cancer development. TAp63 $\alpha$  usually induces senescence and suppresses tumorigenesis while  $\Delta$ Np63 $\alpha$  exhibits primarily oncogenic features.<sup>32,33</sup>

Our data reveal a novel  $\Delta$ Np63-Sp1-MCT4 regulatory axis that may contribute to cell growth and survival of NSCLC cell lines heavily relying on aerobic glycolysis for their energy demands. The NSCLC cell lines tested in this study are mainly lung adenocarcinoma. Supporting our findings, high expression of MCT4 is closely associated with poor prognosis in patients with lung adenocarcinoma.<sup>34,35</sup> High Sp1 levels have also been identified in early stages of patients with lung adenocarcinoma.<sup>36</sup> The role of  $\Delta$ Np63 $\alpha$  in regulating cancer cell metabolism has been observed in various cancers.<sup>37,38</sup>  $\Delta$ Np63 $\alpha$  is one of the most important markers to distinguish the two main subtypes of NSCLC, adenocarcinoma and squamous cell carcinoma. However, interestingly, the current evidence indicates that high expression of  $\Delta$ Np63 $\alpha$  could be frequently detected in lung squamous cell carcinoma, but rare in lung adenocarcinoma.<sup>39</sup> Hence, the biological relevance of  $\Delta$ Np63, Sp1, and MCT4 expression in NSCLC patients remains unclear. Since the co-expression profiling of  $\Delta$ Np63, Sp1, and MCT4 in the tumor specimens of NSCLC patients is still missing, further investigations are needed to unravel the  $\Delta$ Np63-Sp1-MCT4 regulatory pathway in NSCLC and to explain our observations in clinical tumor specimens.

Despite the MCT4 IgM monoclonal antibody developed in this study exhibiting an excellent cell-inhibitory effect in the aerobic glycolysis-preference NSCLC cell subtype, the pentamer structure of the IgM antibody might limit clinical applications. Based on this concern, we selected an MCT4 IgG1 monoclonal antibody via the same screening procedures. In comparison with the IgM monoclonal antibody, the IgG1 monoclonal antibody also showed high-binding affinity to MCT4 on the plasma membrane of CL1-5 and Hop62 cells (Figure S7A), and resulted in increased intracellular lactate concentration, decreased ECAR to OCR ratio, and lowered colony-forming abilities in these NSCLC cells (Figures S7B–S7D). However, the cell-inhibitory

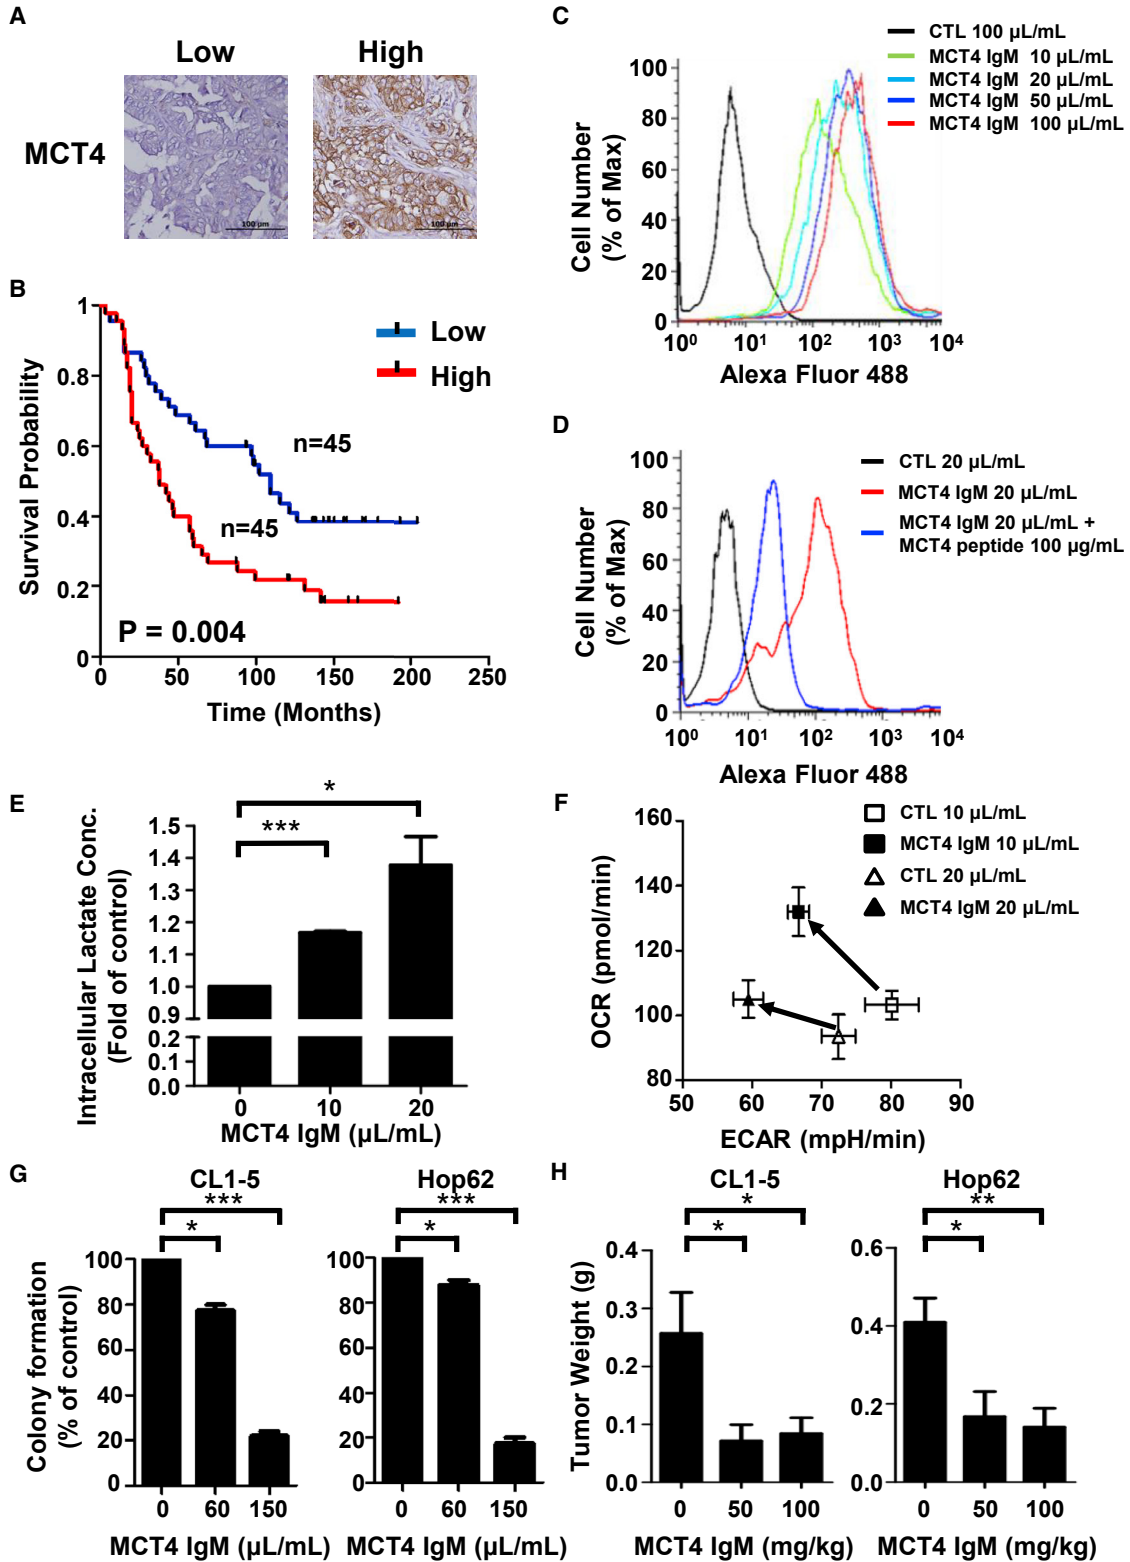

(legend on next page)

activity of the IgG1 monoclonal antibody was weaker than that of the IgM monoclonal antibody. One possible reason for this is that the IgM monoclonal antibodies with pentameric structure can display higher avidity to the target antigen compared to the IgG monoclonal antibodies.<sup>40,41</sup> However, the pentameric structure of IgM monoclonal antibodies could also restrict its distribution and administration during treatment. The neutralizing activity of the MCT4 IgG1 monoclonal antibody warrants further improvement.

Due to the vital roles of MCTs in transporting lactate across membranes, several small molecules have been developed to evaluate the therapeutic potentials of targeting MCT in cancer treatment. The first MCT inhibitor, AR-C155858, was developed to target MCT1 and MCT2 and was shown to effectively suppress lactate export, glycolysis, and tumor growth in a RAS-transformed fibroblast model.<sup>42</sup> A potent MCT1 inhibitor, AZD3965, was then designed with modifications on AR-C155858 and had been applied to various phase I/II clinical trials.<sup>43,44</sup> Nevertheless, unwanted side effects were detected due to the widespread expression of MCT1 in normal tissues. Furthermore, several studies have identified that high MCT4 expression could be a potential resistance mechanism to MCT1 inhibition.<sup>45,46</sup> In accord with this view, the MCT4 neutralizing antibody developed in this study not only can be used to suppress MCT4 function in the aerobic glycolysis-preference NSCLC cell subtype, but can also be used as monotherapy or combination therapy with the MCT1 inhibitor for a large number of cancers. In summary, our findings provide new insights into the molecular mechanism by which  $\Delta Np63\alpha$  and Sp1 coordinately regulate MCT4 transcriptional expression in the aerobic glycolysis-preference NSCLC cell subtype. The newly developed MCT4 neutralizing antibody showing anti-proliferation efficacy may offer new therapeutic strategy for treatments to prevent cancer cell growth.

## MATERIALS AND METHODS

Please see the [Supplemental Materials and Methods](#) for more details.

### Cell Lines

The human lung adenocarcinoma cell line PC9 was a gift from Dr. C.H. Yang (Graduate Institute of Oncology, Cancer Research Center, National Taiwan University). The human lung adenocarcinoma cell line A549, H1299, H3255, H1975, and Hop62 were purchased from American Type Culture Collection (Rockville, MD). The human lung cancer cell line CL1-5 was previously selected using an *in vitro*

modified Boyden Chamber invasion assay in our laboratory.<sup>26</sup> The human lung cancer cell lines, CL97, CL942, and CL141, were isolated from pleural effusion of NSCLC patients.<sup>47</sup> In general, PC9, Hop62, CL1-5, CL97, H3255, H1975, CL942, and CL141 cells were cultured in RPMI-1640 medium with 10% FBS (v/v) and penicillin (100 units/mL)/ streptomycin (100  $\mu$ g/mL). A549 and H1299 cells were cultured in DMEM with 10% FBS (v/v) and penicillin (100 units/mL)/ streptomycin (100  $\mu$ g/mL). Culture dishes were maintained in a humidified incubator at 37°C in 5% CO<sub>2</sub>/95% air.

### Measurement of ECAR and OCR

The ECAR and OCR levels were measured according to the manufacturer's instructions. Briefly, cells were seeded in XF96 cell culture microplate for 1 day before measurement. The sensor cartridges were pre-incubated with the calibration solution overnight in a non-CO<sub>2</sub> incubator at 37°C. On the day of assay, the medium was changed to assay medium without glucose with 2% FBS. Glucose was loaded to the injection port before the measurement and automatically injected into each well according to the protocol. The OCR and ECAR were measured by the sensor probe on a Seahorse XF Extracellular Flux Analyzers (Agilent, Santa Clara, CA).

### Sulforhodamine B (SRB) Assay

Cells were incubated with cell culture medium with or without indicated reagents for specific durations, and the anti-proliferation effect was assessed. Cells were first fixed using 10% (wt/vol) trichloroacetic acid for 30 min, and stained with 0.4% (wt/vol) SRB in 1% acetic acid for 30 min. The excess dye was removed by repeated washing with 1% acetic acid. The protein-bound dye was then dissolved in 10 mM Tris base solution, and the results were read by enzyme-linked immunosorbent assay (ELISA) reader (540 nm).

### Determination of Intracellular pH Using pHrodo Dye

Cells were harvested by trypsinization and washed with PBS. After centrifugation, cells were suspended in PBS with 2% FBS and stained with pHrodo Red dye in power load buffer (Thermo Fisher Scientific) at 37°C for 30 min. The stained cells were then analyzed with FACS-can and CellQuest software (Becton Dickinson, Mountain View, CA).

### MCT4 Monoclonal Antibody Production and Purification

BALB/c mice were used to produce MCT4 monoclonal antibodies. The hybridoma supernatants and ascites fluid were obtained

## Figure 6. MCT4 Neutralizing Antibodies Can Effectively Inhibit the Proliferation of the Aerobic Glycolysis-Preference NSCLC Cell Subtype

(A) Representative images of immunohistochemical staining of MCT4 in NSCLC patients with high or low MCT4 expression levels. (B) The correlation between MCT4 expression level and overall survival probability of NSCLC patients. The correlation was measured using Kaplan-Meier survival curve analysis in a cohort of 90 NSCLC patients from the National Taiwan University Hospital. (C) The binding of our MCT4 IgM antibody with cell-surface MCT4 in CL1-5 cells was detected using Alexa Fluor 488 conjugated anti-mouse IgM antibody by flow cytometry. (D) The competition effect of the original immunogenic peptide to the interaction between our MCT4 IgM antibody and cell-surface MCT4 was detected using Alexa Fluor 488 conjugated anti-mouse IgM antibody by flow cytometry. (E) Intracellular lactate concentration of CL1-5 and Hop62 cells was measured by a lactate assay kit after incubating with MCT4 IgM antibody-containing ascites or control ascites for 6 h. Data represent mean and SD. n = 4. (F) The basal ECAR and OCR levels of CL1-5 and Hop62 cells was measured using a Seahorse XF analyzer after incubating with MCT4 IgM antibody-containing ascites or control ascites for 48 h. Data represent mean and SD. n = 3. (G) The anti-proliferative effect of MCT4 antibody in CL1-5 and Hop62 cells. The colonies were fixed, stained, and dissolved as described in the [Materials and Methods](#) after incubating with MCT4 IgM antibody-containing ascites or control ascites for 7 days. The graph indicated the total absorbance values at 490 nm in MCT4 IgM antibody-containing ascites group relative to that in control ascites group, which were set to 100%. Data represent mean and SD. n = 3. (H) The weight of CL1-5 and Hop62 subcutaneous tumors treated with different concentrations of MCT4 IgM antibody for 23 days. Data represent mean and SD. n = 6.

according to current protocols.<sup>48</sup> The neutralizing activity of the monoclonal antibodies was tested using the lactate assay kit. The ascites fluid samples were collected and stored at  $-80^{\circ}\text{C}$  until time of purification. The isotype of the antibody was determined using the Mouse Ig Isotyping Ready-SET-Go! ELISA Kit (Thermo Fisher Scientific) according to the manufacturer's instructions. The anti-MCT4 IgM monoclonal antibody was further purified with 1 mL HiTrap IgM Purification HP columns (GE Healthcare Life Sciences, Chicago, IL) according to the manufacturer's instructions.

#### Clinical Lung Cancer Samples and Immunohistochemistry

Lung cancer specimens from 90 NSCLC patients who underwent surgical resection at the National Taiwan University Hospital were analyzed for the expression of the MCT4 protein. The sections were fixed in formalin and embedded in paraffin. The primary antibody against MCT4 was obtained from Santa Cruz Biotechnology. The immunohistochemistry results were scored and classified into two groups according to the average staining intensity and area. The MCT4-low expression group corresponded to a positive staining of  $<50\%$  of the tissue sections, and the MCT4-high expression group corresponded to a positive staining of  $>50\%$  of the tissue sections. The immunostaining results were assessed and scored independently by two pathologists.

#### Statistics

Data were presented as mean  $\pm$  SD values. The Kaplan-Meier method was used to estimate overall survival. Differences in survival between the two groups, MCT4-high and MCT4-low, were analyzed using the log-rank test. Multivariate Cox proportional hazard regression analysis with stepwise selection was used to evaluate independent prognostic factors associated with patient survival, and the expression of MCT4, gender, and tumor stage were used as covariates. Two-tailed Student's t-test were used and p values  $< 0.05$  were considered statistically significant. (\*p  $< 0.05$ ; \*\*p  $< 0.01$ ; \*\*\*p  $< 0.001$ ).

#### Ethics Approval and Consent to Participate

All animal protocols were evaluated and approved by the Institutional Animal Care and Use Committee of Academia Sinica and Council of Agriculture Guidebook for the Care and Use of Laboratory Animals. (Protocol ID: 13-11-593). The protocol of human sample collection and immunohistochemistry staining was evaluated and approved by the Institutional Review Board/Research Ethics Committee (IRB/REC) of National Taiwan University Hospital. IRB/REC was approved to waive the requirement of informed consent in this protocol (Protocol ID: 201505139RINC).

#### SUPPLEMENTAL INFORMATION

Supplemental Information can be found online at <https://doi.org/10.1016/j.omto.2020.06.012>.

#### AUTHOR CONTRIBUTIONS

Conceptualization, T.-C.K., T.-H.H., and P.-C.Y.; Methodology, T.-C.K., K.-Y.H., S.-C.Y., and Y.-L.C.; Investigation, T.-C.K., K.-Y.H., S.-C.Y., W.-C. C., and Y.-L.C.; Writing – Original Draft, T.-C.K.;

Writing –Review & Editing, S.W., T.-M.H., S.-P.W., H.-Y.C., T.-H.H., and P.-C.Y.; Funding Acquisition, S.-P.W., H.-Y.C., and P.-C.Y.; Resources, H.-Y.C., T.-H.H., P.-C.Y.; Supervision, H.-Y.C., T.-H.H., P.-C.Y.

#### CONFLICTS OF INTEREST

The authors declare no competing interests.

#### ACKNOWLEDGMENTS

We are grateful for the technical service support from the Experimental Animal Facility and DNA Sequencing Laboratory (Institute of Biomedical Sciences, Academia Sinica) and the support of bioinformatics work and computational and storage resources from the Mathematics in Biology Group (Institute of Statistical Science, Academia Sinica) and National Center for High-Performance Computing of National Applied Research Laboratories in Taiwan. Additionally, we thank Dr. Yidong Chen (Graduate School of Biomedical Sciences, University of Texas Health Science Center at San Antonio) for using TRANSFAC database to predict the potential TFs in regulating the expression of MCT4. This research was supported by grants from Ministry of Science and Technology (MOST-106-2314-B-002-103-MY2, MOST-107-0210-01-19-01, MOST-107-2314-B-002-239, MOST-108-3114-Y-001-002, MOST-108-2314-B-002-195, MOST-108-2314-B-002-027, MOST-108-2320-B-001-007-MY2, MOST-108-2319-B-492-001, and MOST-109-0210-01-18-02) and Academia Sinica (AS-SUMMIT-109 and AS-KPQ-109-BioMed) in Taiwan.

#### REFERENCES

- Zugazagoitia, J., Guedes, C., Ponce, S., Ferrer, I., Molina-Pinelo, S., and Paz-Ares, L. (2016). Current Challenges in Cancer Treatment. *Clin. Ther.* *38*, 1551–1566.
- Camidge, D.R., Pao, W., and Sequist, L.V. (2014). Acquired resistance to TKIs in solid tumours: learning from lung cancer. *Nat. Rev. Clin. Oncol.* *11*, 473–481.
- Hanahan, D., and Weinberg, R.A. (2011). Hallmarks of cancer: the next generation. *Cell* *144*, 646–674.
- Vander Heiden, M.G. (2011). Targeting cancer metabolism: a therapeutic window opens. *Nat. Rev. Drug Discov.* *10*, 671–684.
- Phan, L.M., Yeung, S.C., and Lee, M.H. (2014). Cancer metabolic reprogramming: importance, main features, and potentials for precise targeted anti-cancer therapies. *Cancer Biol. Med.* *11*, 1–19.
- Hu, L., Zeng, Z., Xia, Q., Liu, Z., Feng, X., Chen, J., Huang, M., Chen, L., Fang, Z., Liu, Q., et al. (2019). Metformin attenuates hepatoma cell proliferation by decreasing glycolytic flux through the HIF-1 $\alpha$ /PFKFB3/PFK1 pathway. *Life Sci.* *239*, 116966.
- Kim, E.H., Jang, H., Shin, D., Baek, S.H., and Roh, J.L. (2016). Targeting Nrf2 with wogonin overcomes cisplatin resistance in head and neck cancer. *Apoptosis* *21*, 1265–1278.
- Mullard, A. (2016). Cancer metabolism pipeline breaks new ground. *Nat. Rev. Drug Discov.* *15*, 735–737.
- Park, J., Shim, J.K., Kang, J.H., Choi, J., Chang, J.H., Kim, S.Y., and Kang, S.G. (2018). Regulation of bioenergetics through dual inhibition of aldehyde dehydrogenase and mitochondrial complex I suppresses glioblastoma tumorspheres. *Neuro-oncol.* *20*, 954–965.
- Hu, J., Locasale, J.W., Bielas, J.H., O'Sullivan, J., Sheahan, K., Cantley, L.C., Vander Heiden, M.G., and Vitkup, D. (2013). Heterogeneity of tumor-induced gene expression changes in the human metabolic network. *Nat. Biotechnol.* *31*, 522–529.
- Daemen, A., Peterson, D., Sahu, N., McCord, R., Du, X., Liu, B., Kowanetz, K., Hong, R., Moffat, J., Gao, M., et al. (2015). Metabolite profiling stratifies pancreatic ductal



- adenocarcinomas into subtypes with distinct sensitivities to metabolic inhibitors. *Proc. Natl. Acad. Sci. USA* 112, E4410–E4417.
12. Haukaas, T.H., Euceda, L.R., Giskeødegård, G.F., Lamichhane, S., Krohn, M., Jernström, S., Aure, M.R., Lingjærde, O.C., Schlichting, E., Garred, Ø., et al.; Oslo Breast Cancer Consortium (OSBREAC) (2016). Metabolic clusters of breast cancer in relation to gene- and protein expression subtypes. *Cancer Metab.* 4, 12.
  13. Warburg, O.H. (1930). *The Metabolism of Tumours: Investigations from the Kaiser Wilhelm Institute for Biology, Berlin-Dahlem* (London, UK: Arnold Constable).
  14. Liberti, M.V., and Locasale, J.W. (2016). Correction to: “The Warburg Effect: How Does it Benefit Cancer Cells?” [*Trends in Biochemical Sciences*, 41 (2016) 211]. *Trends Biochem. Sci.* 41, 287.
  15. Walenta, S., and Mueller-Klieser, W.F. (2004). Lactate: mirror and motor of tumor malignancy. *Semin. Radiat. Oncol.* 14, 267–274.
  16. Doherty, J.R., and Cleveland, J.L. (2013). Targeting lactate metabolism for cancer therapeutics. *J. Clin. Invest.* 123, 3685–3692.
  17. Pérez-Escuredo, J., Van Hée, V.F., Sboarina, M., Falces, J., Payen, V.L., Pellerin, L., and Sonveaux, P. (2016). Monocarboxylate transporters in the brain and in cancer. *Biochim. Biophys. Acta* 1863, 2481–2497.
  18. Halestrap, A.P., and Wilson, M.C. (2012). The monocarboxylate transporter family—role and regulation. *IUBMB Life* 64, 109–119.
  19. Payen, V.L., Mina, E., Van Hée, V.F., Porporato, P.E., and Sonveaux, P. (2020). Monocarboxylate transporters in cancer. *Mol. Metab.* 33, 48–66.
  20. Doyen, J., Trastour, C., Ettore, F., Peyrottes, I., Toussant, N., Gal, J., Ilc, K., Roux, D., Parks, S.K., Ferrero, J.M., and Pouyssegur, J. (2014). Expression of the hypoxia-inducible monocarboxylate transporter MCT4 is increased in triple negative breast cancer and correlates independently with clinical outcome. *Biochem. Biophys. Res. Commun.* 451, 54–61.
  21. Gao, H.J., Zhao, M.C., Zhang, Y.J., Zhou, D.S., Xu, L., Li, G.B., Chen, M.S., and Liu, J. (2015). Monocarboxylate transporter 4 predicts poor prognosis in hepatocellular carcinoma and is associated with cell proliferation and migration. *J. Cancer Res. Clin. Oncol.* 141, 1151–1162.
  22. Ullah, M.S., Davies, A.J., and Halestrap, A.P. (2006). The plasma membrane lactate transporter MCT4, but not MCT1, is up-regulated by hypoxia through a HIF-1 $\alpha$ -dependent mechanism. *J. Biol. Chem.* 281, 9030–9037.
  23. Baenke, F., Dubuis, S., Brault, C., Weigelt, B., Dankworth, B., Griffiths, B., Jiang, M., Mackay, A., Saunders, B., Spencer-Dene, B., et al. (2015). Functional screening identifies MCT4 as a key regulator of breast cancer cell metabolism and survival. *J. Pathol.* 237, 152–165.
  24. Baek, G., Tse, Y.F., Hu, Z., Cox, D., Buboltz, N., McCue, P., Yeo, C.J., White, M.A., DeBerardinis, R.J., Knudsen, E.S., and Witkiewicz, A.K. (2014). MCT4 defines a glycolytic subtype of pancreatic cancer with poor prognosis and unique metabolic dependencies. *Cell Rep.* 9, 2233–2249.
  25. Wang, J., Gao, Q., Wang, D., Wang, Z., and Hu, C. (2015). Metformin inhibits growth of lung adenocarcinoma cells by inducing apoptosis via the mitochondria-mediated pathway. *Oncol. Lett.* 10, 1343–1349.
  26. Chu, Y.W., Yang, P.C., Yang, S.C., Shyu, Y.C., Hendrix, M.J., Wu, R., and Wu, C.W. (1997). Selection of invasive and metastatic subpopulations from a human lung adenocarcinoma cell line. *Am. J. Respir. Cell Mol. Biol.* 17, 353–360.
  27. Han, T., Kang, D., Ji, D., Wang, X., Zhan, W., Fu, M., Xin, H.B., and Wang, J.B. (2013). How does cancer cell metabolism affect tumor migration and invasion? *Cell Adhes. Migr.* 7, 395–403.
  28. Nylander, K., Vojtesek, B., Nenutil, R., Lindgren, B., Roos, G., Zhanxiang, W., Sjöström, B., Dahlqvist, A., and Coates, P.J. (2002). Differential expression of p63 isoforms in normal tissues and neoplastic cells. *J. Pathol.* 198, 417–427.
  29. Monti, P., Ciribilli, Y., Bisio, A., Foggetti, G., Raimondi, I., Campomenosi, P., Menichini, P., Fronza, G., and Inga, A. (2014).  $\Delta$ N-P63 $\alpha$  and TA-P63 $\alpha$  exhibit intrinsic differences in transactivation specificities that depend on distinct features of DNA target sites. *Oncotarget* 5, 2116–2130.
  30. Pavlova, N.N., and Thompson, C.B. (2016). The Emerging Hallmarks of Cancer Metabolism. *Cell Metab.* 23, 27–47.
  31. Nishi, H., Senoo, M., Nishi, K.H., Murphy, B., Rikiyama, T., Matsumura, Y., Habu, S., and Johnson, A.C. (2001). p53 Homologue p63 represses epidermal growth factor receptor expression. *J. Biol. Chem.* 276, 41717–41724.
  32. Bergholz, J., and Xiao, Z.X. (2012). Role of p63 in Development, Tumorigenesis and Cancer Progression. *Cancer Microenviron.* 5, 311–322.
  33. Guo, X., Keyes, W.M., Papazoglu, C., Zuber, J., Li, W., Lowe, S.W., Vogel, H., and Mills, A.A. (2009). TAp63 induces senescence and suppresses tumorigenesis in vivo. *Nat. Cell Biol.* 11, 1451–1457.
  34. Ruan, Y., Zeng, F., Cheng, Z., Zhao, X., Fu, P., and Chen, H. (2017). High expression of monocarboxylate transporter 4 predicts poor prognosis in patients with lung adenocarcinoma. *Oncol. Lett.* 14, 5727–5734.
  35. Meijer, T.W., Schuurbijs, O.C., Kaanders, J.H., Looijen-Salamon, M.G., de Geus-Oei, L.F., Verhagen, A.F., Lok, J., van der Heijden, H.F., Rademakers, S.E., Span, P.N., and Bussink, J. (2012). Differences in metabolism between adeno- and squamous cell non-small cell lung carcinomas: spatial distribution and prognostic value of GLUT1 and MCT4. *Lung Cancer* 76, 316–323.
  36. Hsu, T.I., Wang, M.C., Chen, S.Y., Yeh, Y.M., Su, W.C., Chang, W.C., and Hung, J.J. (2012). Sp1 expression regulates lung tumor progression. *Oncogene* 31, 3973–3988.
  37. Gong, L., Pan, X., Lim, C.B., de Polo, A., Little, J.B., and Yuan, Z.M. (2018). A functional interplay between  $\Delta$ 133p53 and  $\Delta$ Np63 in promoting glycolytic metabolism to fuel cancer cell proliferation. *Oncogene* 37, 2150–2164.
  38. Viticchiè, G., Agostini, M., Lena, A.M., Mancini, M., Zhou, H., Zolla, L., Dinsdale, D., Saintigny, G., Melino, G., and Candi, E. (2015). p63 supports aerobic respiration through hexokinase II. *Proc. Natl. Acad. Sci. USA* 112, 11577–11582.
  39. Nonaka, D. (2012). A study of  $\Delta$ Np63 expression in lung non-small cell carcinomas. *Am. J. Surg. Pathol.* 36, 895–899.
  40. Rudnick, S.I., and Adams, G.P. (2009). Affinity and avidity in antibody-based tumor targeting. *Cancer Biother. Radiopharm.* 24, 155–161.
  41. Rosenes, Z., Mulhern, T.D., Hatters, D.M., Ilag, L.L., Power, B.E., Hosking, C., Hensel, F., Howlett, G.J., and Mok, Y.F. (2012). The anti-cancer IgM monoclonal antibody PAT-SM6 binds with high avidity to the unfolded protein response regulator GRP78. *PLoS ONE* 7, e44927.
  42. Ovens, M.J., Davies, A.J., Wilson, M.C., Murray, C.M., and Halestrap, A.P. (2010). AR-C155858 is a potent inhibitor of monocarboxylate transporters MCT1 and MCT2 that binds to an intracellular site involving transmembrane helices 7–10. *Biochem. J.* 425, 523–530.
  43. Bola, B.M., Chadwick, A.L., Michopoulos, F., Blount, K.G., Telfer, B.A., Williams, K.J., Smith, P.D., Critchlow, S.E., and Stratford, I.J. (2014). Inhibition of monocarboxylate transporter-1 (MCT1) by AZD3965 enhances radiosensitivity by reducing lactate transport. *Mol. Cancer Ther.* 13, 2805–2816.
  44. Guan, X., Rodriguez-Cruz, V., and Morris, M.E. (2019). Cellular Uptake of MCT1 Inhibitors AR-C155858 and AZD3965 and Their Effects on MCT-Mediated Transport of L-Lactate in Murine 4T1 Breast Tumor Cancer Cells. *AAPS J.* 21, 13.
  45. Polański, R., Hodgkinson, C.L., Fusi, A., Nonaka, D., Priest, L., Kelly, P., Trapani, F., Bishop, P.W., White, A., Critchlow, S.E., et al. (2014). Activity of the monocarboxylate transporter 1 inhibitor AZD3965 in small cell lung cancer. *Clin. Cancer Res.* 20, 926–937.
  46. Curtis, N.J., Mooney, L., Hopcroft, L., Michopoulos, F., Whalley, N., Zhong, H., Murray, C., Logie, A., Revill, M., Byth, K.F., et al. (2017). Pre-clinical pharmacology of AZD3965, a selective inhibitor of MCT1: DLBCL, NHL and Burkitt’s lymphoma anti-tumor activity. *Oncotarget* 8, 69219–69236.
  47. Yeh, C.T., Wu, A.T., Chang, P.M., Chen, K.Y., Yang, C.N., Yang, S.C., Ho, C.C., Chen, C.C., Kuo, Y.L., Lee, P.Y., et al. (2012). Trifluoperazine, an antipsychotic agent, inhibits cancer stem cell growth and overcomes drug resistance of lung cancer. *Am. J. Respir. Crit. Care Med.* 186, 1180–1188.
  48. Yokoyama, W.M., Christensen, M., Santos, G.D., and Miller, D. (2006). Production of monoclonal antibodies. *Current Protocols in Immunology* 74, 2.5.1–2.5.25.

OMTO, Volume 18

## **Supplemental Information**

### **Monocarboxylate Transporter 4 Is a Therapeutic**

### **Target in Non-small Cell Lung Cancer**

### **with Aerobic Glycolysis Preference**

**Ting-Chun Kuo, Kuo-Yen Huang, Shuenn-Chen Yang, Sean Wu, Wei-Chia Chung, Yih-Leong Chang, Tse-Ming Hong, Shu-Ping Wang, Hsuan-Yu Chen, Tzu-Hung Hsiao, and Pan-Chyr Yang**

Supplemental data  
Figure S1

A

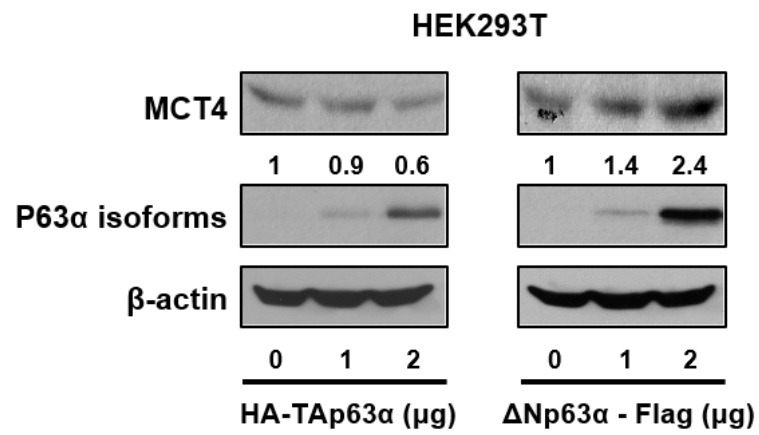

B

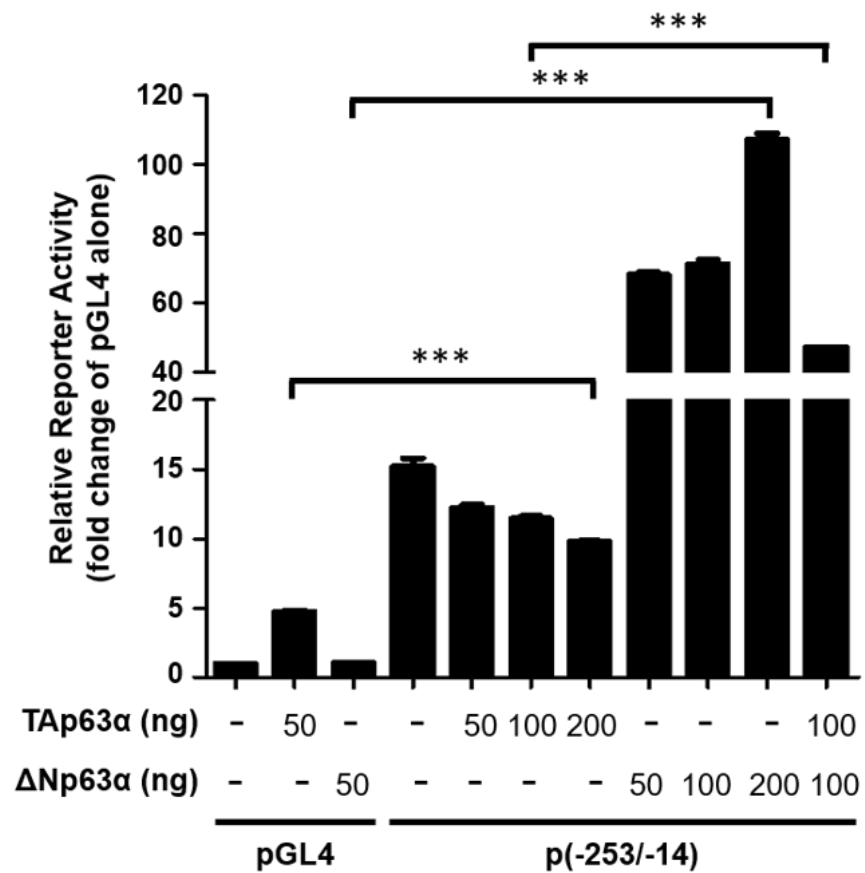

**Figure S1 - TAp63 $\alpha$  will suppress the transcription of *SLC16A3* gene while  $\Delta$ Np63 $\alpha$  would promote the transcription of *SLC16A3* gene in HEK293T cells**

(A) The protein level of MCT4 was detected by immunoblotting in the HEK293T cells with TAp63 $\alpha$  or  $\Delta$ Np63 $\alpha$  overexpression. (B) HEK293T cells were co-transfected with vector, TAp63 $\alpha$  or  $\Delta$ Np63 $\alpha$  plasmids, indicated luciferase reporter constructs, and pRL-SV40 as a transfection control. Luciferase activity was measured 48 hours post-transfection. The promoter activity of the specific region between -253 to -14 on the *SLC16A3* promoter was expressed as a ratio of firefly/Renilla luciferase activities in HEK293T cells with TAp63 $\alpha$  or  $\Delta$ Np63 $\alpha$  overexpression.



Figure S2

A

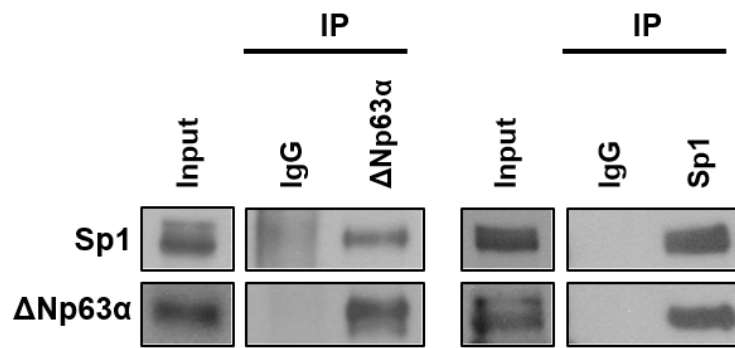

B

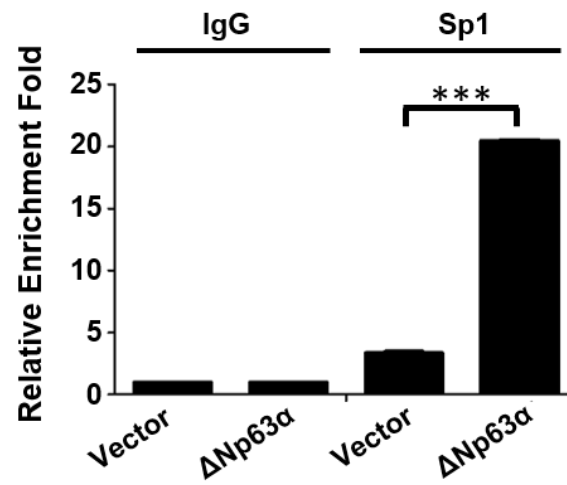

C

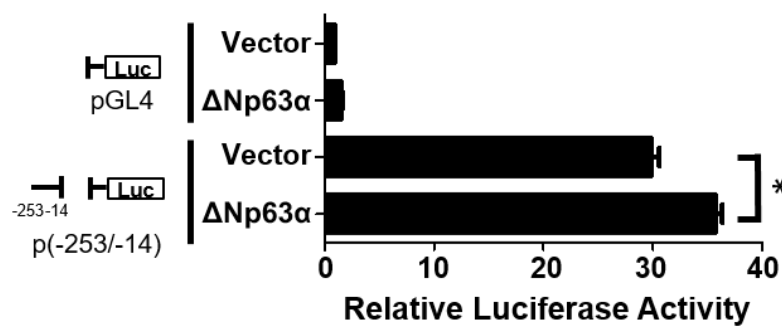

**Figure S2 -  $\Delta$ Np63 $\alpha$  facilitates the binding of Sp1 to the promoter region of *SLC16A3* and stimulates the promoter activity of *SLC16A3***

(A) The interaction between  $\Delta$ Np63 $\alpha$  and Sp1 was detected by immunoprecipitation method in PC9 cells overexpressed  $\Delta$ Np63 $\alpha$ . PC9 cell lysates were immunoprecipitated with anti- $\Delta$ Np63 $\alpha$ , anti-rabbit IgG (left panel), anti-Sp1, or anti-rabbit IgG (right panel) antibodies and immunoblotted with the indicated antibodies. (B) The interaction of Sp1 with the specific region between -253 to -14 on the *SLC16A3* promoter was determined by the ChIP assay in PC9 cells with or without  $\Delta$ Np63 $\alpha$  overexpression. PC9 cells were transfected with vector or  $\Delta$ Np63 $\alpha$  plasmids for 30 h, and then ChIP assays were performed using anti-Sp1 antibody. Immunoprecipitated chromatin was analyzed using specific TaqMan probe with primers specific to the *SLC16A3* promoter, between -253 to -14. (C) PC9 cells were co-transfected with vector or  $\Delta$ Np63 $\alpha$  plasmids, indicated luciferase reporter constructs, and pRL-SV40 as a transfection control. Luciferase activity was measured 48 hours post-transfection. The promoter activity of the specific region between -253 to -14 on the *SLC16A3* promoter was expressed as a ratio of firefly/Renilla luciferase activities in PC9 NSCLC cells with or without  $\Delta$ Np63 $\alpha$  overexpression.

Figure S3

A

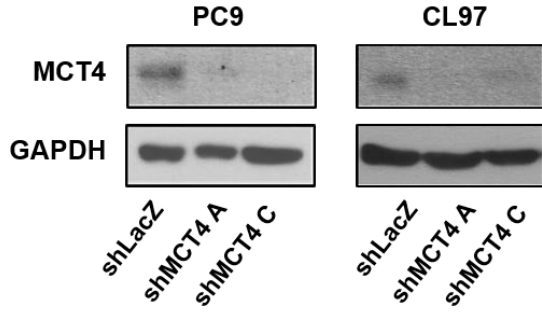

B

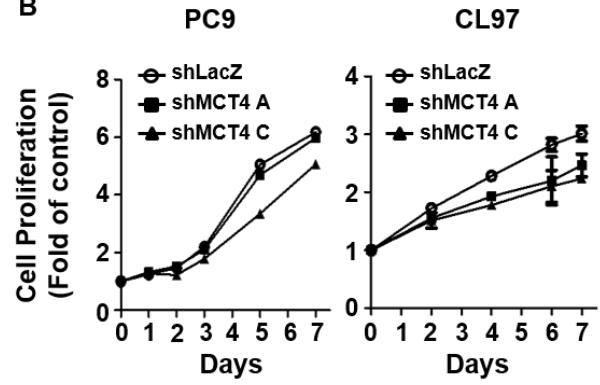

C

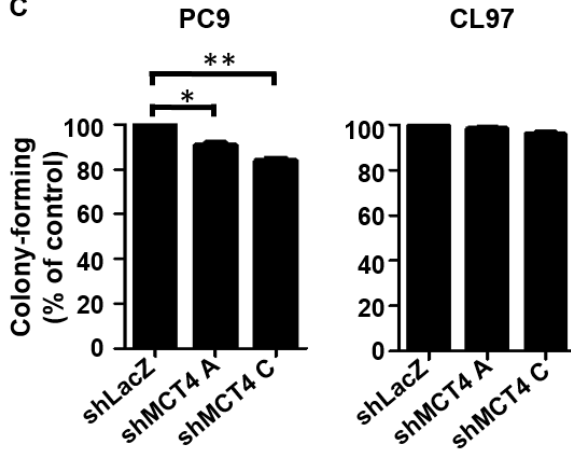

D

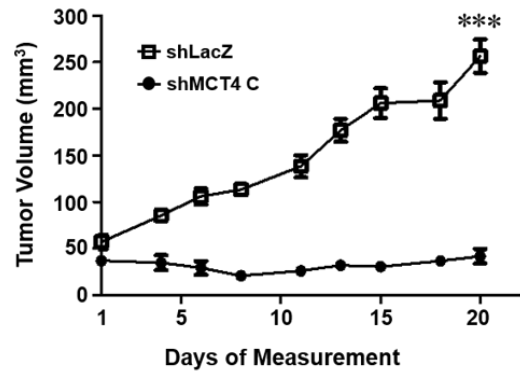

**Figure S3 – Knockdown of MCT4 has mild effects *in vitro* but has significant anti-proliferation effect *in vivo* in the OXPHOS-preference NSCLC cell subtype**

(A) The protein level of MCT4 after transduction with shRNA virus targeting *SLC16A3* gene or LacZ control was detected by immunoblotting in PC9 and CL97 cells. (B) The cell proliferation rate of PC9 and CL97 cells after transduction with shRNA virus targeting *SLC16A3* gene or LacZ control was detected by SRB assays. The cells were fixed at the indicated day and detected as described in Methods. The graph indicated the fold change between each day vs. day 0. (C) The colony formation ability of PC9 and CL97 cells was detected by colony formation assays after transduction with shRNA virus targeting *SLC16A3* gene or LacZ control. The colonies were fixed, stained, and dissolved as described in Methods. The graph indicated the total absorbance values at 490 nm in shMCT4 groups relative to that in shLacZ group, which were set to 100%. (D) The growth curve of PC9 subcutaneous tumors in nude mice with or without MCT4 knockdown by shRNA virus.



Figure S4

A

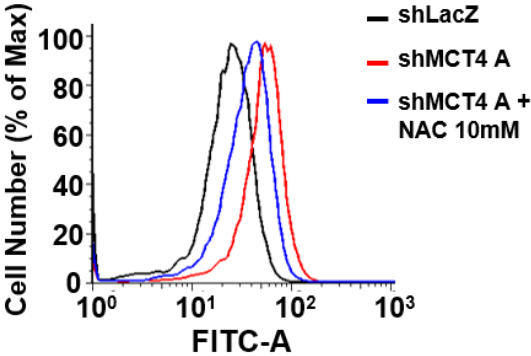

B

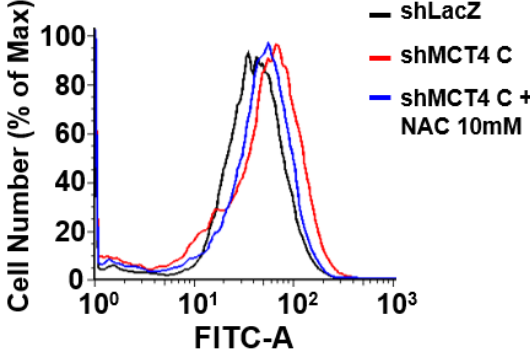

**Figure S4 – NAC can effectively reduce intracellular ROS induced by MCT4 knockdown in CL1-5 NSCLC cells**

(A and B) The intracellular ROS level was detected in CL1-5 NSCLC cells with or without 10 mM NAC treatment at 72 hours after transduction with shRNA virus targeted *SLC16A3* gene or LacZ control by flow cytometry with DCFH-DA dye.

Figure S5

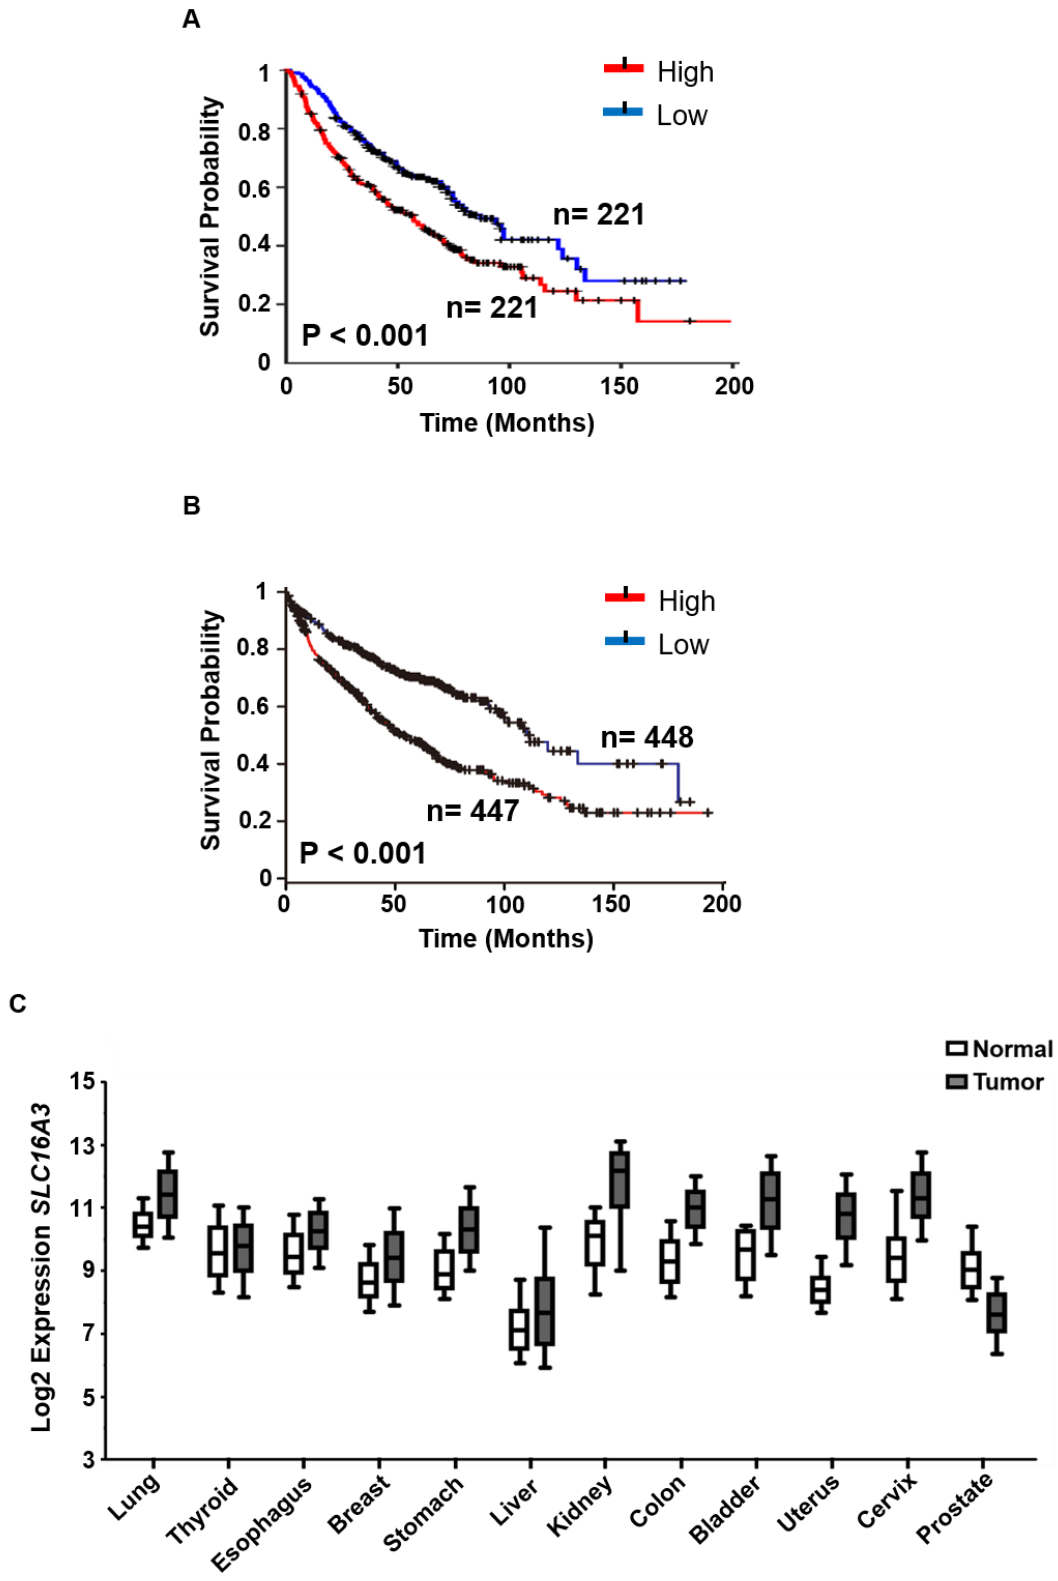

**Figure S5 - High expression of MCT4 can be observed in many types of cancer tissues and serves as a poor prognostic factor for NSCLC patients**

(A and B) The correlation between *SLC16A3* gene expression level and overall survival of NSCLC patients. The correlation was measured using Kaplan-Meier survival curve analysis with 202856\_s\_at probe in Shedden and KM-plotter datasets. (C) The RNA expression data of *SLC16A3* gene across tissues and cancer types. The data were downloaded from Genotype Tissue Expression project (GTEx) and The Cancer Genome Atlas (TCGA) and normalized by a pipeline developed by Wang and his colleagues.<sup>1-3</sup> The line in the middle of the box was plotted at the median and the whiskers were drawn down to the 10th percentile and up to the 90th.

Figure S6

A

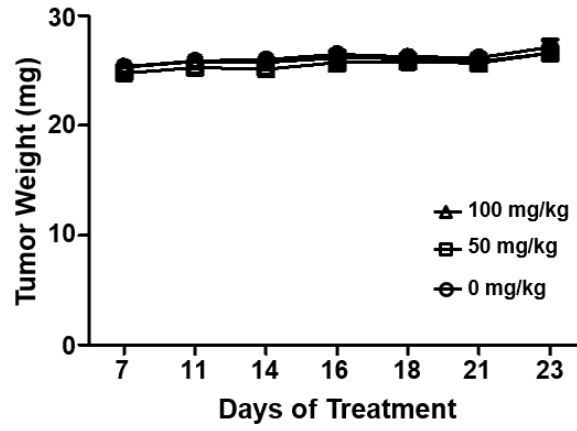

B

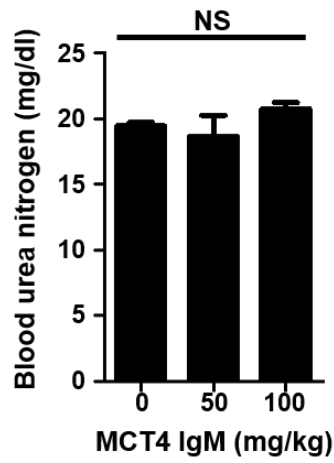

C

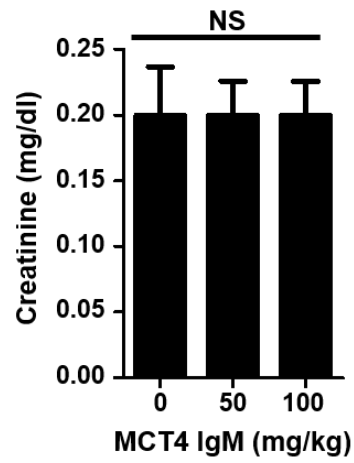

D

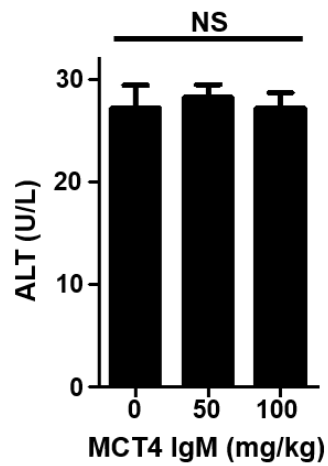

E

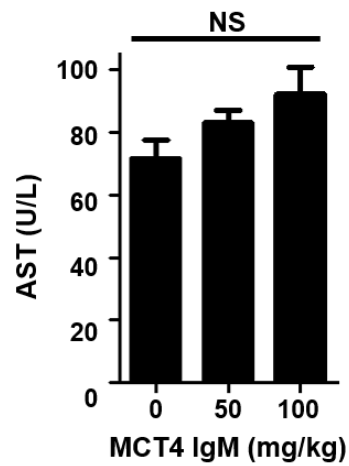

**Figure S6 - The IgM monoclonal antibody treatment is relatively safe, resulting in minimal weight loss and no obvious toxicity to the kidney or liver tissue**

(A) Body weight, (B) blood urea nitrogen, (C) Creatinine, (D) ALT, (E) AST for mice from each group. NS: non-significant.

Figure S7

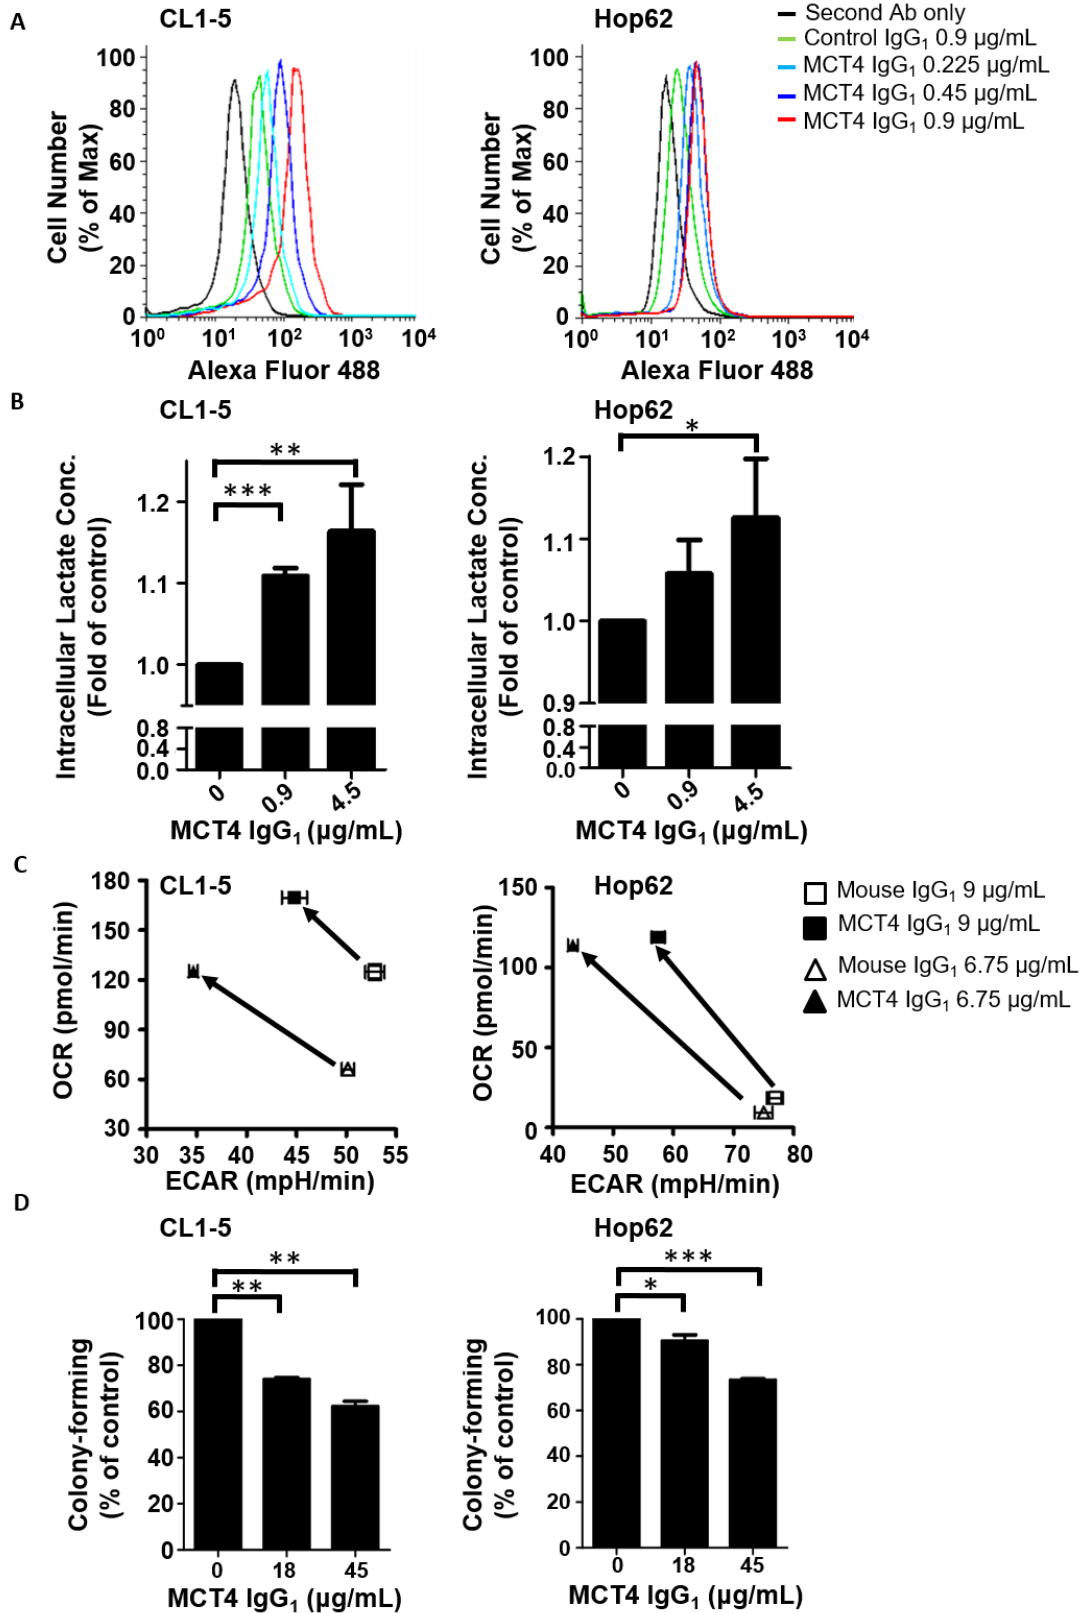



**Figure S7 - Anti-MCT4 IgG<sub>1</sub> monoclonal antibody can neutralize the function of MCT4 and inhibit the proliferation of the aerobic glycolysis-preference NSCLC cell subtype**

(A) The binding of our MCT4 IgG<sub>1</sub> antibody with cell-surface MCT4 in CL1-5 and Hop62 cells was detected using Alexa Fluor 488 conjugated anti-mouse IgG antibody by flow cytometry. (B) Intracellular lactate concentration of CL1-5 and Hop62 cells was measured by a lactate assay kit after incubating with MCT4 IgG<sub>1</sub> antibody or mouse IgG<sub>1</sub> isotype control for 24 hours. (C) The basal ECAR and OCR levels of CL1-5 and Hop62 cells was measured using a Seahore XF analyzer after incubating with MCT4 IgG<sub>1</sub> antibody or mouse IgG<sub>1</sub> isotype control for 48 hours. (D) The anti-proliferative effect of MCT4 antibody in CL1-5 and Hop62 cells. The colonies were fixed, stained, and dissolved as described in Methods after incubating with MCT4 IgG<sub>1</sub> antibody or mouse IgG<sub>1</sub> isotype control for 7 days. The graph indicated the total absorbance values at 490 nm in MCT4 IgG<sub>1</sub> antibody group relative to that in mouse IgG<sub>1</sub> isotype control group, which were set to 100%.

**Table S1 - Multivariate analysis of independent prognostic factors for patient survival in the three independent datasets**

| Variables | Dataset 1<br>(From NTUH) |         | Dataset 2<br>(From the Shedden cohort) |         | Dataset 3<br>(From the KM-plotter database) |         |
|-----------|--------------------------|---------|----------------------------------------|---------|---------------------------------------------|---------|
|           | Hazard Ratio             |         | Hazard Ratio                           |         | Hazard Ratio                                |         |
|           | (95% CI)                 | P value | (95% CI)                               | P value | (95% CI)                                    | P value |
| Gender    | 1.57 (0.90-2.74)         | 0.112   | 1.37 (1.06-1.70)                       | 0.018   | 1.40 (1.14-1.73)                            | 0.001   |
| Stage     | 1.78 (1.29-2.45)         | < 0.001 | 2.4 (2.05-2.8)                         | < 0.001 | 1.53 (1.35-1.75)                            | < 0.001 |
| MCT4      | 1.72 (1.01-2.91)         | 0.045   | 1.21 (1.03-1.30)                       | 0.003   | 1.81 (1.47-2.23)                            | < 0.001 |

## Supplemental Materials and Methods

**Reagents** Roswell Park Memorial Institute (RPMI) 1640 medium, Dulbecco's Modified Eagle's Medium (DMEM) and fetal bovine serum (FBS) were obtained from GIBCO/BRL Life Technologies (Grand Island, NY). Antibodies against MCT1 (SC-365501), MCT4 (SC-50329), Sp1 (SC-17824), and anti-mouse (SC-2005) and anti-rabbit (SC-2004) IgGs were obtained from Santa Cruz Biotechnology (Santa Cruz, CA). Antibodies against MCT2 (GTX129600) was purchased from GeneTex (Hsinchu, Taiwan). Antibodies against poly(ADPribose) polymerase-1 (PARP-1) (9546), caspase-9 (9502) and caspase-3 (9662) were purchased from Cell Signaling Technologies (Boston, MA). Antibody against  $\beta$ -actin (A5441) was obtained from Merck Millipore (Billerica, MA). Antibody against MCT3 (ab60333) and TAp63 (ab124762) was obtained from Abcam (Cambridge, UK). Antibody against  $\Delta$ Np63 (619001) was obtained from BioLegend (San Diego, CA). Antibody against Sp1 (39058) used for chromatin immunoprecipitation was obtained from BioLegend (San Diego, CA). Alexa Fluor 488-conjugate goat anti-mouse IgM antibody (A21042) was obtained from Thermo Fisher Scientific (Waltham, MA). Dimethylsulfoxide (DMSO), crystal violet, ammonium persulfate (APS), N,N,N',N'-tetramethylethylenediamine (TEMED), sodium dodecyl sulfate (SDS), glycine, TRIS hydrochloride, TRIS base, formaldehyde, penicillin, streptomycin, sodium bicarbonate, glucose, 2-deoxyglucose, trichloroacetic acid, sulforhodamine B (SRB), acetic acid, Na-deoxycholate, Nonidet P-40, sodium chloride, and sodium phosphate were obtained from Merck Millipore.

**Immunoblotting** The cells were harvested and lysed in RIPA lysis buffer (1% Nonidet P-40, 1% Na-deoxycholate, 0.1% SDS solution, 0.15 M NaCl, and 0.01 M sodium phosphate, pH 7.2). Protein concentration was then measured by using the BCA assay (Thermo Fisher Scientific). Equivalent amounts of cell extracts were separated using SDS-PAGE with protein loading dye and transferred to polyvinylidene membranes (Merck Millipore). The membranes were blocked with 5% non-fat milk in PBS containing 0.1% Tween-20 (Merck Millipore) for 1 hour and incubated with respective primary antibodies overnight at 4°C followed by incubation with appropriate HRP-conjugated secondary antibodies for 1 hour at room temperature. The signal was visualized with an ECL detection system.

**Quantitative PCR analysis** Total RNA was isolated using TRIzol reagent (Thermo Fisher Scientific). *SLC16A3* (Hs02758991\_g1), the region between -253 to -14 of *SLC16A3* promoter, and the endogenous control GAPDH (Hs00358829\_m1) were analyzed using Applied Biosystems TaqMan Gene Expression Assay systems (Thermo Fisher Scientific).

**Construction of *SLC16A3* knockdown lentivirus** Two *SLC16A3* shRNAs (shMCT4 A & shMCT4 C) and control shRNA plasmid were purchased from the National RNAi Core Facility (Taipei, Taiwan). The sequences were as follows: shMCT4 A: 5'-CCGGCGTCTACATGTACGTGTTTCATCTCGAGATGAACACGTACATGTAGACGT TTTTG-3'; shMCT4 C: 5'-CCGGGCTCATCATGCTGAACCGCTACTCGAGTAGCGGTTTCAGCATGATGAGC TTTTTG-3'; control shLacZ: 5'-CCGGTGTTTCGCATTATCCGAACCATCTCGAGATGGTTCGGATAATGCGA ACATTTTTTG-3'. The three shRNAs were cloned into the vector pLKO.1. The lentiviral particles were produced by transfecting the plasmids along with the packaging plasmid pCMV- $\Delta$ R8.91 and the envelope plasmid pMD.G into 293T cells.

**Luciferase reporter assay** Cells were co-transfected with 200 ng of pGL4 vector or pGL4-*SLC16A3* promoter plasmid and the Renilla luciferase pRL-SV40 plasmid (Promega, Fitchburg, WI). Cells were lysed 36 hours after transfection, and luciferase activity was measured using a Dual-Luciferase system (Promega) according to the manufacturer's instructions.

**Chromatin immunoprecipitation** Chromatin immunoprecipitation was performed using the Magna ChIP A/G Chromatin Immunoprecipitation Kit (Merck Millipore) according to the manufacturer's instructions. Briefly, Cells were fixed with 1% formaldehyde for 10 min and blocked with 125 mM glycine for 5 min. Then, the cells were suspended in cell lysis buffer and spun to pellet the nuclear fraction. The nuclear fraction was next suspended in nuclear lysis buffer and sonicated to shear the DNA. The sheared and cross-linked chromatin was then incubated with anti-Sp1 or control rabbit IgG antibody overnight at 4 °C. The DNA-protein complexes were then incubated with protein G agarose beads at 4 °C for 2 hours. Following immunoprecipitation, the beads were washed with four different buffers according to the manufacturer's protocol. The immunoprecipitated complexes were then treated with proteinase K at 62 °C for 2 hours and eluted by incubating at 95 °C for 10 min. The DNA was purified using spin columns and used as templates for qPCR amplification with primers specific to the *SLC16A3* promoter region.

**Measurement of intracellular lactate concentration** The concentration of intracellular lactate was measured by the L-Lactate Assay Kit I (Eton Bioscience, San Diego, CA), according to the manufacturer's instructions.

**RNA-Sequencing** CL1-5 NSCLC cells transduced with shRNA virus targeted *SLC16A3* gene or LacZ control was collected in TRIzol (Thermo Fisher Scientific) for RNA extraction. The RNA samples would then be purified by the RNeasy Mini Kit and DNase I (Qiagen). The mRNA contents were enriched by using oligo(dT)-labeled magnetic beads, followed by fragmentation, conversion into cDNA, ligation of sequencing adaptors, and amplification. Quality-checked library products were subjected to 75-bp paired-end sequencing using a NextSeq 500 sequencer (Illumina Inc) with a throughput of approximately 20 million reads per sample. The sequencing reads were aligned to the Ensembl GRCh37 human reference genome by TopHat2. The HTSeq software was used to count the mapped reads against Ensembl annotated genes (ENSG IDs). Gene-level read counts were normalized and fold change was evaluated.

**Gene set enrichment analysis (GSEA)** GSEA software was used to identify cellular functions associated with MCT4 knockdown. Briefly, transcriptome-wide genes were ranked based on the significance of differential expression between the shMCT4 and shLacZ groups. Predefined gene ontology gene sets (C5) were downloaded from the MSigDB and tested for enrichment on either side of the ranked list.

**Colony formation assay** Colonies were fixed with 3.7% formaldehyde and stained with crystal violet. The cell-bound crystal violet was dissolved in 10 % acetic acid and read by ELISA reader (490 nm).

**MCT4 monoclonal antibody production and purification** BALB/c mice were used to produce MCT4 monoclonal antibody. The hybridoma supernatants and ascites fluid were obtained according to current protocols. Briefly, BALB/c mice (6 weeks old) were given five subcutaneous injections of Freund's adjuvant (Merck Millipore) mixed with the peptide with the sequence pertaining to the extracellular domain of the MCT4 protein (peptide sequence: PLGQLLQDRYGWRGGFLILGGC). Three days after the final injection, 10  $\mu$ g MCT4 peptide was intraperitoneally injected into the mice. The spleens were removed 3 days after the final intraperitoneal injection. Lymphocytes were isolated and fused with the FO myeloma cell line using a standard polyethylene glycol fusion technique. The hybridoma supernatants were tested for MCT4 inhibition using the lactate assay kit. For antibody ascites production, BALB/c mice (8 weeks old) were intraperitoneally injected with 0.5 ml of pristane (2, 6, 10, 14-tetramethyldecanoic acid) at the first day. After one week, approximately  $2 \times 10^6$  hybridoma FO cells/ml in PBS were injected into the pristane-treated BALB/c mice. The mice were observed daily for abdominal distension and ascites fluid was collected approximately 7-14 days after cell injections. After the collection of ascites fluid, the fluid was centrifuged at 3000x g for 15 minutes to separate the serum from other blood components. The straw-colored fluid was collected as the ascites fluid. The fluid was then stored at  $-80^\circ\text{C}$  until the time of purification. The mouse Ig isotype was determined using the Mouse Ig Isotyping Ready-SET-Go! ELISA Kit (Thermo Fisher Scientific) according to the manufacturer's instructions. The anti-MCT4 IgM monoclonal antibody was further purified with 1 ml HiTrap IgM Purification HP columns (GE Healthcare Life Sciences, Chicago, IL) according to the manufacturer's instructions.

**In vivo animal models** Animals were raised in a specific-pathogen-free environment in the animal facility at the Institute of Biomedical Sciences, Academia Sinica.

In the subcutaneous tumor model, CL1-5 ( $2 \times 10^6$ / mouse), Hop62 ( $2 \times 10^6$ / mouse), PC9 ( $2 \times 10^6$ / mouse) or A549 ( $4 \times 10^6$ / mouse) cells were subcutaneously injected into the flanks of 6-week-old male NOD/SCID mice or nude BALB/c nu/nu mice. When the size of subcutaneous tumor reached 50 mm<sup>3</sup>, the animals were randomized divided into different groups. For the experiment of metformin treatment, the animals were given intraperitoneal injections of PBS or metformin (300 mg/kg in Hop62 group and 250 mg/kg in A549 group) daily. For the experiment of MCT4 knockdown by inducible shRNA system, 25mg/kg doxycycline hyclate was given daily by oral gavage. For the experiment of anti-MCT4 IgM monoclonal antibody, the animals in the control group were given intratumor injections of elution buffer with control mouse IgM once a week for 3 weeks. The animals in the treatment group were given intratumor injections with 0.5  $\mu$ g or 0.25  $\mu$ g anti-MCT4 antibody once a week for 3 weeks. The body weight and tumor size were measured three times per week during the treatment period. The tumor volume was determined by measuring the largest diameters (l) and smallest diameters (s), and the volumes were calculated ( $V = 0.5 \times s^2$ ).

### **Supplemental References**

1. Wang Q, Gao J, Nikolaus S. Figshare <http://doi.org/10.6084/m9.figshare.5330539> (2017).
2. Wang Q, Gao J, Nikolaus S. Figshare <http://doi.org/10.6084/m9.figshare.5330575> (2017).
3. Wang Q, Gao J, Nikolaus S. Figshare <http://doi.org/10.6084/m9.figshare.5330593> (2017).
